# Supplementary material for: Intersectional stigma and its impact on HIV prevention and care among MSM and WSW in sub-Saharan African countries: a protocol for a scoping review
Source: PubMed Central journal article supplement — BMJ Open. 2021 Aug 6;11(8):e047280. doi: 10.1136/bmjopen-2020-047280 (PMC8351482; doi:10.1136/bmjopen-2020-047280), 2021-08-06
Supplement: bmjopen-2020-047280.draft_revisions.pdf [file bmjopen-2020-047280.draft_revisions.pdf]

# BMJ Open

BMJ Open is committed to open peer review. As part of this commitment we make the peer review history of every article we publish publicly available.

When an article is published we post the peer reviewers' comments and the authors' responses online. We also post the versions of the paper that were used during peer review. These are the versions that the peer review comments apply to.

The versions of the paper that follow are the versions that were submitted during the peer review process. They are not the versions of record or the final published versions. They should not be cited or distributed as the published version of this manuscript.

BMJ Open is an open access journal and the full, final, typeset and author-corrected version of record of the manuscript is available on our site with no access controls, subscription charges or pay-per-view fees (<http://bmjopen.bmj.com>).

If you have any questions on BMJ Open's open peer review process please email [info.bmjopen@bmj.com](mailto:info.bmjopen@bmj.com)

# BMJ Open

## Intersectional stigma and its impact on HIV prevention and care among MSM and WSW in sub-Saharan African countries: A protocol for a scoping review

|                               |                                                                                                                                                                                                                                                                                                                                                                                                                                                                                                                                                                                                                                                                                                                                                                                                            |
|-------------------------------|------------------------------------------------------------------------------------------------------------------------------------------------------------------------------------------------------------------------------------------------------------------------------------------------------------------------------------------------------------------------------------------------------------------------------------------------------------------------------------------------------------------------------------------------------------------------------------------------------------------------------------------------------------------------------------------------------------------------------------------------------------------------------------------------------------|
| Journal:                      | <i>BMJ Open</i>                                                                                                                                                                                                                                                                                                                                                                                                                                                                                                                                                                                                                                                                                                                                                                                            |
| Manuscript ID                 | bmjopen-2020-047280                                                                                                                                                                                                                                                                                                                                                                                                                                                                                                                                                                                                                                                                                                                                                                                        |
| Article Type:                 | Protocol                                                                                                                                                                                                                                                                                                                                                                                                                                                                                                                                                                                                                                                                                                                                                                                                   |
| Date Submitted by the Author: | 25-Nov-2020                                                                                                                                                                                                                                                                                                                                                                                                                                                                                                                                                                                                                                                                                                                                                                                                |
| Complete List of Authors:     | Abubakari, Gamji M'Rabiu; Yale University School of Public Health, Center for Interdisciplinary Research on AIDS<br>Dada, Debbie; Yale University School of Nursing; St Michael's Hospital Centre for Urban Health Solutions<br>Nur, Jemal; St Michael's Hospital Centre for Urban Health Solutions, Turner, DeAnne; Center for Interdisciplinary Research on AIDS<br>Otchere, Amma; Yale University School of Nursing<br>Tanis, Leonne; Yale University School of Nursing<br>Ni, Zhao; Yale University School of Medicine<br>Mashoud, Ibrahim; 37 Military Hospital<br>Nyhan, Kate; Yale University, Harvey Cushing/John Hay Whitney Medical Library<br>Nyblade, Laura; RTI International<br>Nelson, Laron; Yale University School of Nursing, ; St Michael's Hospital Centre for Urban Health Solutions, |
| Keywords:                     | HIV & AIDS < INFECTIOUS DISEASES, Public health < INFECTIOUS DISEASES, MENTAL HEALTH                                                                                                                                                                                                                                                                                                                                                                                                                                                                                                                                                                                                                                                                                                                       |
|                               |                                                                                                                                                                                                                                                                                                                                                                                                                                                                                                                                                                                                                                                                                                                                                                                                            |

SCHOLARONE™  
Manuscripts

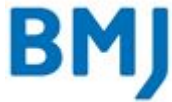

I, the Submitting Author has the right to grant and does grant on behalf of all authors of the Work (as defined in the below author licence), an exclusive licence and/or a non-exclusive licence for contributions from authors who are: i) UK Crown employees; ii) where BMJ has agreed a CC-BY licence shall apply, and/or iii) in accordance with the terms applicable for US Federal Government officers or employees acting as part of their official duties; on a worldwide, perpetual, irrevocable, royalty-free basis to BMJ Publishing Group Ltd ("BMJ") its licensees and where the relevant Journal is co-owned by BMJ to the co-owners of the Journal, to publish the Work in this journal and any other BMJ products and to exploit all rights, as set out in our [licence](#).

The Submitting Author accepts and understands that any supply made under these terms is made by BMJ to the Submitting Author unless you are acting as an employee on behalf of your employer or a postgraduate student of an affiliated institution which is paying any applicable article publishing charge ("APC") for Open Access articles. Where the Submitting Author wishes to make the Work available on an Open Access basis (and intends to pay the relevant APC), the terms of reuse of such Open Access shall be governed by a Creative Commons licence – details of these licences and which [Creative Commons](#) licence will apply to this Work are set out in our licence referred to above.

Other than as permitted in any relevant BMJ Author's Self Archiving Policies, I confirm this Work has not been accepted for publication elsewhere, is not being considered for publication elsewhere and does not duplicate material already published. I confirm all authors consent to publication of this Work and authorise the granting of this licence.

1  
2  
3 **Intersectional stigma and its impact on HIV prevention and care among MSM and WSW**  
4  
5 **in sub-Saharan African countries: a protocol for a scoping review**  
6

7 <sup>1</sup>Gamji M'Rabiu Abubakari, <sup>2,3</sup> Debbie Dada, <sup>3</sup>Jemal D. Nur, <sup>1</sup>DeAnne Turner, <sup>2</sup>Amma  
8 Otchere, <sup>2</sup>Leonne Tanis, <sup>4</sup>Zhao Ni, <sup>5</sup>Ibrahim Wumpini Mashoud, <sup>6</sup>Kate Nyhan, <sup>7</sup>Laura Nyblade,  
9 & <sup>1-3,8</sup>LaRon E. Nelson  
10  
11  
12  
13

14 Correspondence to Dr. Gamji M'Rabiu Abubakari: mohammed-rabiu.abubakari@yale.edu  
15  
16

17 **Author Affiliations**  
18

19 <sup>1</sup>Yale AIDS Prevention Training Program (Y-APT), Center for Interdisciplinary Research on  
20 AIDS (CIRA), School of Public Health/Medicine, Yale University, New Haven, CT, USA; <sup>2</sup>Yale  
21 University School of Nursing, New Haven, CT, USA; <sup>3</sup>MAP Center for Urban Health Solutions,  
22 Unity Health Toronto, Toronto, Canada; <sup>4</sup>School of Medicine, Yale University; <sup>5</sup>37 Military  
23 Hospital Accra, Ghana; <sup>6</sup>Harvey Cushing / John Hay Whitney Medical Library, Yale University;  
24 Environmental Health Sciences, Yale School of Public Health, Yale University; <sup>7</sup>Global Health  
25 Division, International Development Group RTI, International, <sup>8</sup>Yale Institute of Global Health,  
26 Yale University, New Haven, CT, USA;  
27  
28  
29  
30  
31  
32  
33  
34  
35  
36  
37  
38  
39  
40  
41  
42  
43  
44  
45  
46  
47  
48  
49  
50  
51  
52  
53  
54  
55  
56  
57  
58  
59  
60

## Abstract

**Introduction:** Research has established that various forms of stigma (HIV stigma, gender non-conforming stigma, and same-gender sex stigma) exist across Sub-Saharan African countries and have consequences for the utilization of HIV prevention and care services. The two most common ways in which these stigmas are evaluated in HIV literature are investigating individual stigmas and investigating individual key populations and the various forms of stigma they may face that could impact their wellbeing and access to HIV care. The concept of intersectionality highlights the interconnected nature of social categorizations and the ability of these categorizations to create interdependent systems of discrimination based on gender, race, sexuality, etc. This therefore underlines the need for public health scholars to examine the effects of the stigmatization and marginalization of social identities not as distinct realities, but as parts of a whole. Drawing from perspectives in intersectionality literature, intersectional stigma denotes the link and convergence of multiple marginalized identities within a person or at a group level, the experiences of stigma associated with such oppressed identities, as well as the impact of these experiences on health and wellbeing. With respect to HIV, scholars can examine the impacts of multiple stigmas on HIV prevention and care utilization as well as broader health outcomes.

**Methods and analysis:** This scoping review will employ a systematic search through published quantitative and qualitative studies as well as grey literature that include data on stigma, healthcare and HIV status among MSM and WSW in Sub-Saharan Africa. We will search through MEDLINE, Global Health, Embase, Scopus, Web of Science Core Collection, and Africa Index Medicus in addition to citation chaining. Eligible studies will include primary or

1  
2  
3 secondary data on one or more stigmas related to HIV-risk factors, as it relates to MSM or WSW  
4 in Sub-Saharan African countries. Studies must be in French or English. We will exclude  
5  
6 studies published before 1991 as we identified the first article looking at intersection HIV stigma  
7  
8 was published in this year. All screening and data extraction will be performed in duplicate and  
9  
10 if discrepancies arise, they will be settled by consensus or through consultation with LEN or  
11  
12 GMRA. Our findings from this study will be reported according to the Preferred Reporting  
13  
14 Items for Systematic reviews and Meta-Analyses Extension for Scoping Reviews (PRISMA-  
15  
16 ScR).

17  
18  
19  
20  
21 **Ethics and dissemination:** There will be no human participants in this study. Since no protected  
22  
23 data will be used, ethics approval is not required. Our findings will be communicated and  
24  
25 disseminated through conferences, webinars, peer-reviewed manuscripts and can be used to  
26  
27 inform policies and practices in government health agencies.  
28  
29

30  
31 **Strengths and limitations of the study:**

- 32  
33  
34  
35  
36  
37  
38  
39  
40  
41  
42  
43  
44  
45  
46  
47  
48  
49  
50  
51  
52  
53  
54  
55  
56  
57  
58  
59  
60
- This scoping review is reinforced by the comprehensive search strategy designed by an experienced public health librarian and peer reviewed by an independent medical librarian and supplemented with citation chaining.
  - The novel approach to this research topic is a strengths as it will enable us to highlight the current status of intersectional stigma as a key determinant of access to HIV prevention and care among key populations
  - A limitation of this review is the focus on Sub-Saharan Africa, as it restricts its generalizability to the experiences of MSM and WSW globally

## Introduction

Human immunodeficiency virus (HIV) remains one of the leading causes of death worldwide, with the majority of global cases centralized in sub-Saharan Africa (South, East, Central, and West) (1, 2). Though sub-Saharan Africa comprises 12% of the world population, this region accounted for 75% of HIV-related deaths and 65% of new HIV infections globally in 2017 (1, 2). Rates of HIV infections are particularly high in Eastern and Southern Africa, with nine countries in this region accounting for nearly 50% of the global total of people living with HIV (3). In any global context, men who have sex with men (MSM) stand at a heightened risk for HIV infection (4, 5). Within sub-Saharan Africa, HIV prevalence among MSM is three times as high as HIV prevalence in the general male population (5). Also, despite the disproportionate burden of HIV among women in sub-Saharan Africa, limited research examines the prevalence of HIV among women who have sex with women (WSW) in this region (3, 6). There exists a long-standing assumption that WSW do not face a high-risk of HIV infection, yet some existing research has drawn contrary conclusions, supporting the need for investigating the risks of HIV infection and barriers to HIV prevention and care services among WSW in sub-Saharan Africa (6). While MSM and WSW populations contribute a small percentage of the overall population, they have an extremely high risk for HIV transmission with estimated prevalence in Sub-Saharan countries ranging from 12% to as high as 30% (7). MSM and WSW face several barriers to HIV prevention and treatment, from community-wide issues such as (e.g. inadequate financial resources, lack of convenient access to healthcare clinics) to specific barriers that arise as a result of their HIV status and/or from their identity as MSM or WSW (e.g. stigma) (5, 8, 9).

Stigma emanates from a construct of psychological, social, and societal factors that engender and enforce inequalities between groups of people (10). The social ecological model

1  
2  
3 emphasises the multi-layered manner in which people conceive and enact stigma, as well as the  
4 important role power structures play in maintaining it (11). Stigmas are commonly associated  
5 with certain socio-demographic characteristics, behaviors/experiences and health conditions.  
6  
7 Stigma can be manifested and experienced on the individual, interpersonal, institutional and  
8 societal level. Drivers (such as stereotypes and lack of awareness) cause stigma on an individual  
9 level, while facilitators (such as laws, culture and gender norms) cause it at a societal level (12).

10  
11  
12  
13  
14  
15  
16  
17 Intersectional stigma occurs when an individual or group experience(s) multiple stigmas.  
18 It denotes the synergistic effect produced by systems of oppression at the intersection of these  
19 stigmatized identities/behaviours/conditions on wellbeing and health. HIV scholars  
20 predominantly examine stigma and marginalized identities in a piecemeal nature by mainly  
21 focusing on single factors such gender, sexual orientation, profession, race, socioeconomic  
22 status, etc. (13-15). Men who have sex with men living in Sub-Saharan Africa have been  
23 reported to experience intersectional stigma with regards to same-sex attraction, gender-non-  
24 conforming behaviour, actual or perceived HIV status, and others. At health-care facilities, MSM  
25 experience treatment refusal, verbal abuse, and avoidance behaviours (like double gloving) and  
26 socially, they experience physical and verbal harassment, social isolation and discrimination (16-  
27 19). For the sake of preserving interpersonal relationships, many MSM avoid HIV-related care  
28 out of fear of others suspecting that they have sex with men and this anticipated stigma is further  
29 compounded by a fear of discriminatory treatment at healthcare facilities (20, 21). These are just  
30 some of the reasons for which fear of stigmatization and discrimination is a key determinant of  
31 voluntary HIV testing, care-seeking, and linkage to care among MSM (22, 23). By viewing  
32 stigma through an intersectional lens, researchers are able to gain a more comprehensive view of  
33  
34  
35  
36  
37  
38  
39  
40  
41  
42  
43  
44  
45  
46  
47  
48  
49  
50  
51  
52  
53  
54  
55  
56  
57  
58  
59  
60



1  
2  
3 the impact of HIV/AIDS, identify synergies between risk factors that may allow for development  
4 of more impactful and efficient solutions and develop multi-faceted solutions.  
5  
6

7  
8 Different forms of stigma, while often analyzed individually, do not exist singularly.  
9  
10 While MSM and WSW experience unified intersectional forms of stigma, the ways in which  
11 intersectional stigma affects health outcomes for these groups remain poorly understood (24). In  
12 Sub-Saharan Africa specifically, there are a limited number of studies on intersectional stigma  
13 and its implication on HIV-related health outcomes. The primary objective of this study is to  
14 assess the state of science with regards to HIV-related stigma research on MSM and WSW  
15 populations in Sub-Saharan Africa. It aims to investigate the common presentations of stigma in  
16 HIV research and the prevalence of stigma being discussed and conceptualized in research as an  
17 intersectional experience. The secondary objective of this study is to evaluate how the  
18 experience of intersectional stigma is shown to affect HIV prevention and care for MSM and  
19 WSW in literature. Overall, this study intends to provide an overview of intersectional  
20 experiences of stigma for MSM and WSW and its effects on HIV-related health outcomes.  
21  
22  
23  
24  
25  
26  
27  
28  
29  
30  
31  
32  
33  
34

### 35 **Methods and Analysis**

36  
37 To develop this protocol for the scoping review, we used the guideline for scoping  
38 reviews; the Preferred Reporting Items for Systematic Reviews and Meta-Analysis extension for  
39 Scoping Reviews (PRISMA-ScR) (25). As explained by Tricco et al., (2018), before a scoping  
40 review, the research team needs to develop a protocol to explain the intent and processes of the  
41 scoping review (25). Such a protocol, when reviewed and published, will ensure transparency of  
42 the process and avoidance of duplication of efforts.  
43  
44  
45  
46  
47  
48  
49  
50

### 51 **Ethics and dissemination**

1  
2  
3 There will be no human participants and no data collection in this study. As such, ethics  
4 approval is not required (26). The findings from this study will be disseminated through  
5 conferences, webinars, peer-reviewed manuscripts and could inform policies and practices in  
6 government health agencies and other healthcare facilities.  
7  
8  
9  
10

### 11 **Patient and Public Involvement**

12  
13  
14 We will not engage MSM and WSW when conducting this scoping review. We however  
15 anticipate to disseminate findings to the public especially audiences in HIV research, and  
16 practice to inform knowledge on research and decision making in health care practice and policy  
17 (27).  
18  
19  
20  
21  
22

### 23 **Criteria for Study Inclusion**

24  
25  
26 For an article to qualify for inclusion in this scoping review it must discuss at least one or  
27 more stigmas related to HIV-risk factors, prevention, intervention, or care. The study must also  
28 present primary data or secondary involving MSM, or WSW, and conducted in a single or  
29 multiple sub-Saharan African countries. The United Nations defines sub-Saharan African  
30 countries to include all countries south of the Sahara, namely; Angola, Benin, Botswana, Burkina  
31 Faso, Burundi, Cameroon, Central African Republic, Chad, Congo, Cote d'Ivoire, Eritrea,  
32 Ethiopia, Gabon, Gambia, Ghana, Guinea, Guinea-Bissau, Kenya, Lesotho, Liberia, Madagascar,  
33 Malawi, Mali, Mauritania, Mauritius, Mozambique, Namibia, Niger, Nigeria, Rwanda, Senegal,  
34 Sierra Leone, Somalia, South Africa, United Republic of Tanzania, Togo, Uganda, Zaire,  
35 Zambia, and Zimbabwe (28). To ensure an extensive inclusion of articles from all parts of sub-  
36 Saharan Africa, we will include studies conducted or written in English or French languages.  
37  
38  
39  
40  
41  
42  
43  
44  
45  
46  
47  
48  
49  
50

51  
52 Considering that research on the impact of intersectional stigma on HIV prevention and  
53 care remains limited, we intend to include all articles that examine stigma among MSM and  
54  
55  
56  
57  
58  
59  
60

1  
2  
3 WSW, from 1991 to present at the screening stage, and extract data from articles that discuss  
4 intersectional stigma for analysis. As indicated earlier, the first article that examined the  
5 combination of HIV stigma and sexuality among participants was published in 1991 (29).  
6  
7 Keeping articles that discuss piecemeal stigma will enable the team to quantify and compare  
8 studies on intersectional stigma and others on piecemeal stigma. We will exclude studies that  
9  
10 combine data from sub-Saharan African countries with data from other countries in a way that  
11 the team cannot extract the data on sub-Saharan African countries distinctively.  
12  
13  
14  
15  
16  
17  
18

19 **Types of studies.** Both experimental and observational studies will be considered in this  
20 review. Studies will not be excluded based on methodological approaches; quantitative,  
21 qualitative, and mixed methods studies will be considered. Articles synthesizing existing  
22 literature, such as reviews, will not be included in analysis but will be used for citation chaining.  
23  
24  
25  
26  
27

## 28 **Search Strategy**

29  
30  
31 **Identifying sources.** Author KN, a research librarian for the Yale University School of  
32 Public Health, will lead the search for articles; authors GMRA, LEN, and DD will support KN in  
33 identifying sources of grey literature from reports of organizations that examine HIV in sub-  
34 Saharan African countries.  
35  
36  
37  
38  
39  
40  
41

42 **Electronic database searching.** We will search for relevant documents in key public  
43 health sources MEDLINE (Ovid), Global Health (Ovid), and Embase (Ovid), and bibliographic  
44 databases that index content across disciplines: Scopus, Web of Science Core Collection (as  
45 licensed at Yale). We will also search regional literature databases: Africa-Wide Information and  
46 Africa Index Medicus (through Global Index Medicus).  
47  
48  
49  
50  
51  
52  
53  
54  
55  
56  
57  
58  
59  
60

1  
2  
3 **Grey literature searching.** To identify other pertinent documents not found in the  
4 electronic search of bibliographic databases, we will search for theses, dissertations, and  
5 conference papers in the databases ProQuest Dissertations and Theses Global, Open Access  
6 Theses and Dissertations, and Networked Digital Library of Theses and Dissertations. We will  
7 also search on organizational websites, such as the United Nations Program on HIV/AIDS –  
8 UNAIDS, the Global Fund, International AIDS Society, and the World Health Organization –  
9 WHO. Additionally, we will identify and contact key scholars who examine HIV in sub-Saharan  
10 African countries on possible reports and sources of articles that examine stigma, and  
11 unidentified by the team. Finally, we will supplement our searches of traditional bibliographic  
12 databases by searching Google Scholar and screening results until the Google Scholar relevance  
13 ranking order shows us 20 results that are not relevant.  
14  
15  
16  
17  
18  
19  
20  
21  
22  
23  
24  
25  
26  
27  
28

### 29 **Data Screening**

30  
31 Studies will be imported into EndNote and duplicates will be removed. The remaining  
32 citations and abstracts, as well as inclusion and exclusion criteria, will be added to Covidence  
33 Systematic Review Software (30). Using Covidence Systematic Review Software, four reviewers  
34 will screen the title and abstract of the first 50 articles in pairs, as recommended in the PRISMA-  
35 ScR guideline, to ensure clarity of the inclusion and exclusion criteria (25). Inter-rater reliability  
36 (IRR) will be estimated using Cohen's kappa. Acceptable agreement will be considered at  $k=0.80$   
37 (31). If we cannot determine study eligibility from the title and abstract alone, the full text will  
38 be screened to determine eligibility. After IRR is determined, each of the remaining articles will  
39 be reviewed by two independent reviewers. Disagreements will be resolved through team  
40 consensus; if a consensus cannot be reached, LEN or GMRA will be consulted.  
41  
42  
43  
44  
45  
46  
47  
48  
49  
50  
51  
52  
53

### 54 **Data Extraction**

1  
2  
3       **Content.** After screening articles for eligibility, we aim to extract the data on publication  
4 information, conceptualization components, methodology, and results. On *publication*  
5 *information*, we will extract author names, year of publication, the journal of publication, and  
6 funding source, when applicable. On *conceptualization components*, we will extract information  
7 on the research questions or hypothesis, theoretical or conceptual frameworks used, if any,  
8 variables (e.g. types of stigma measured, condom use, sex episodes). Concerning the  
9 *methodology*, we will extract information on the study design (e.g. qualitative design, mixed-  
10 method design, quantitative design), sampling and recruitment techniques (e.g. simple random  
11 sampling, snowball sampling), and methods of data collection (e.g. interviews, surveys, focus  
12 group discussion). We will also extract information on the analytical techniques (e.g. correlation,  
13 qualitative coding). Additionally, we will extract data on the *setting of the study* (e.g. country,  
14 cardinal point location, rural/urban areas, if identified). For the *results*, we will first extract the  
15 participant information (MSM, WSW, number of participants, socio-economic characteristics,  
16 such as age range, income, education). We will then extract findings of the study on  
17 intersectional stigma and its impact on HIV prevention and care in the population. For each  
18 finding, we will extract information, such as main thematic areas, quotes, measures of central  
19 tendency, and statistical findings, when applicable. We will not extract data from single stigma  
20 article beyond identifying the type of stigma examined (e.g. gender, HIV)

21  
22  
23       **Process.** To enable a systematic and coordinated approach to data extraction, we will use  
24 a data extraction Google Form with questions for each extractor to enter the findings from the  
25 study. The tool has specific questions that extractors need to answer. At least two authors will  
26 extract data from each article to ensure consistency. The two authors will meet to discuss and  
27 evaluate the extracted data for missing information or contradicting reports. Authors GMRA and  
28  
29  
30  
31  
32  
33  
34  
35  
36  
37  
38  
39  
40  
41  
42  
43  
44  
45  
46  
47  
48  
49  
50  
51  
52  
53  
54  
55  
56  
57  
58  
59  
60

1  
2  
3 LEN will meet with extractors to reach consensus on contradictory information if the primary  
4 reviewers could not arrive at a decision.  
5  
6  
7

### 8 9 **Analyses and reporting**

10  
11 We will report the findings from the extracted data based on PRISMA-ScR guidelines  
12 (25). We will use a table to report the results based on the questions. We will then provide a  
13 narrative synthesis of the findings based on the common themes that answer the specific research  
14 questions.  
15  
16  
17  
18  
19

### 20 **Outcome**

21  
22 The primary outcome of this study is investigating the nature of intersectional stigma  
23 associated with HIV risk factors experienced by MSM and WSW living in Sub-Saharan Africa  
24 as well as evaluating the scope of and gaps in existing literature on stigma associated with these  
25 populations. The secondary outcome of this study is investigating the impacts of intersectional  
26 stigma on access to HIV prevention and care services among our target population.  
27  
28  
29  
30  
31  
32  
33  
34  
35

## 36 **DISCUSSION**

37  
38 Sexual minorities including MSM and WSW experienced various forms of stigma that have joint  
39 effects on their health and wellbeing in Sub-Saharan African countries (32). The convergence of  
40 those stigmas named intersectional stigma faced by these groups has greatly impacted their HIV  
41 prevention and care on a daily basis (33, 34). Studying the influence of the intersectional stigma  
42 in Sub-Saharan African region is important where higher levels of HIV transmission and HIV-  
43 related mortality occurred (35). Many interventions have been initiated in this region to expand  
44 access to HIV treatment and prevention services (36), but a limited number of studies have  
45 investigated the role of the intersectional stigma that it played in those interventions. Also,  
46  
47  
48  
49  
50  
51  
52  
53  
54  
55  
56  
57  
58  
59  
60

1  
2  
3 research from multiple disciplines has established that characteristics including social-economic  
4 status, race, and sex could privilege or disadvantage people at the individual and societal level  
5  
6 (33), but very few studies investigated the experiences and consequences of living with  
7  
8 intersectional stigma aimed to reduce the burden of HIV in this region. Specifically, more  
9  
10 research is needed to study how to reduce the intersectional stigma that hindered individuals to  
11  
12 community-delivered HIV prevention and care services.  
13  
14

15  
16 This scoping review will contribute important knowledge to HIV prevention, but it is not without  
17  
18 limitations. Its specificity to the Sub-Saharan African region may reduce its relevance to other  
19  
20 parts of the world. Nevertheless, given intersectional stigma exists across geopolitical contexts  
21  
22 and this scoping review includes an extensive search on current literature, we believe that the  
23  
24 knowledge it generated could be applied globally.  
25  
26  
27

### 28 **Ethical Consideration**

29  
30 Considering that we will not engage patients or the public in the scoping review, we do  
31  
32 not need to seek ethical approval from our Institutional Review Board – IRB.  
33  
34

### 35 **Dissemination Plan**

36  
37 We will publish the scoping review findings in a peer-reviewed journal to ensure that other  
38  
39 scholars, practitioners, and the general public can access it for use. We will also present the  
40  
41 findings at HIV and stigma conferences and other spaces when the opportunity arises.  
42  
43 Additionally, we will use the findings to conceptualize new studies to fill in the scholarly gaps  
44  
45 identified.  
46  
47  
48  
49

### 50 **Funding statement:**

51  
52 This study was made possible with funding from the National Institutes of Health,  
53  
54 National Institute of Nursing Research, Multi-Level Intervention Addressing Intersectional  
55  
56  
57  
58  
59

1  
2  
3 Stigma to Improve HIV Testing in MSM (R01 NR019009). We thank the Behavioural Insights  
4  
5 Team at the Yale Institute of Global Health for their support in the preparation of our data  
6  
7 extraction form.  
8  
9

### 11 **Acknowledgements:**

12  
13  
14 This publication was also made possible through core services and support from the Yale  
15  
16 University Center for Interdisciplinary Research on AIDS (P30 MH062294) and the Yale AIDS  
17  
18 Prevention Training Program (T32MH020031).  
19  
20  
21  
22  
23  
24  
25  
26  
27  
28  
29  
30  
31  
32  
33  
34  
35  
36  
37  
38  
39  
40  
41  
42  
43  
44  
45  
46  
47  
48  
49  
50  
51  
52  
53  
54  
55  
56  
57  
58  
59  
60



## References

1. James SL, Abate D, Abate KH, *et al.* Global, regional, and national incidence, prevalence, and years lived with disability for 354 diseases and injuries for 195 countries and territories, 1990–2017: a systematic analysis for the Global Burden of Disease Study 2017. *The Lancet*. 2018;392(10159):1789-858.
2. Roth GA, Abate D, Abate KH, *et al.* Global, regional, and national age-sex-specific mortality for 282 causes of death in 195 countries and territories, 1980–2017: a systematic analysis for the Global Burden of Disease Study 2017. *The Lancet*. 2018;392(10159):1736-88.
3. UN Joint Program on AIDS (UNAIDS). *The Gap Report*. Geneva: United Nations; 2014.
4. Baral S, Sifakis F, Cleghorn F, *et al.* Elevated Risk for HIV Infection among Men Who Have Sex with Men in Low- and Middle-Income Countries 2000–2006: A Systematic Review. *PLOS Medicine*. 2007;4(12):e339.
5. Beyrer C, Baral SD, van Griensven F, *et al.* Global epidemiology of HIV infection in men who have sex with men. *The Lancet* 2012;380(9839):367-77.
6. Tat SA, Marrazzo JM, Graham SM. Women Who Have Sex with Women Living in Low- and Middle-Income Countries: A Systematic Review of Sexual Health and Risk Behaviors. *LGBT Health*. 2015;2(2):91-104.
7. Samuel, K. MSM living in African countries that criminalise gay sex are at a much higher risk of getting HIV. *NAM AIDSMAP*. 2020;<https://www.aidsmap.com/news/jul-2020/msm-living-african-countries-criminalise-gay-sex-are-much-higher-risk-getting-hiv>.

- 1  
2  
3 8. Croome N, Ahluwalia M, Hughes LD, *et al.* Patient-reported barriers and facilitators to  
4 antiretroviral adherence in sub-Saharan Africa. *AIDS*. 2017;31(7):995-1007.  
5  
6
- 7  
8 9. Poteat TC, Logie CH, Adams D, *et al.* Stigma, sexual health, and human rights among  
9 women who have sex with women in Lesotho. *Reprod Health Matters*. 2015;23(46):107-  
10  
11  
12 16.  
13
- 14  
15 10. "Tackling HIV Stigma: What Works? Using the Global Evidence Base to Reduce the  
16 Impact of HIV Stigma." National AIDS Trust. FCB Health Network, June 2016. Web.  
17  
18
- 19  
20 11. Baral S, Logie CH, Grosso A, Wirtz AL, Beyrer C. Modified Social Ecological Model: A  
21 Tool to Guide the Assessment of the Risks and Risk Contexts of HIV Epidemics. *BMC*  
22  
23  
24  
25  
26  
27 12. Stangl A, Brady L, Fritz K. STRIVE Technical Brief: Measuring HIV stigma and  
28 discrimination; International Center for Research on Women, Washington D.C., USA;  
29  
30  
31  
32 2012 (updated in 2018).
- 33  
34 13. Jackson-Best F, Edwards N. Stigma and intersectionality: a systematic review of  
35 systematic reviews across HIV/AIDS, mental illness, and physical disability. *BMC*  
36  
37  
38  
39  
40  
41 14. Mburu G, Ram M, Siu G, Bitira D, Skovdal M, Holland P. Intersectionality of HIV  
42 stigma and masculinity in eastern Uganda: implications for involving men in HIV  
43  
44  
45  
46  
47  
48 15. Hargreaves JR, Busza J, Mushati P, Fearon E, Cowan, FM. Overlapping HIV and sex-  
49 work stigma among female sex workers recruited to 14 respondent-driven sampling  
50 surveys across Zimbabwe, 2013. *AIDS Care*. 2016;29(6):675–685.  
51  
52  
53  
54  
55  
56  
57  
58  
59  
60

- 1  
2  
3 16. Kushwaha S, Lalani Y, Maina G, *et al.* “But the moment they find out that you are  
4  
5 MSM...”: a qualitative investigation of HIV prevention experiences among men who  
6  
7 have sex with men (MSM) in Ghana’s health care system. *BMC Public Health.*  
8  
9 2017;17(1). doi:10.1186/s12889-017-4799-1  
10  
11  
12 17. Kennedy CE, Baral SD, Fielding-Miller R, *et al.* “They are human beings, they are  
13  
14 Swazi”: intersecting stigmas and the positive health, dignity and prevention needs of  
15  
16 HIV-positive men who have sex with men in Swaziland. *Journal of the International*  
17  
18 *AIDS Society.* 2013;16(4 Suppl 3):18749. doi:10.7448/ias.16.4.18749  
19  
20  
21 18. Cloete A, Simbayi LC, Kalichman SC, Strebel A, Henda N. Stigma and discrimination  
22  
23 experiences of HIV-positive men who have sex with men in Cape Town, South Africa.  
24  
25 *AIDS Care.* 2008;20(9):1105–1110. doi:10.1080/09540120701842720  
26  
27  
28 19. Anderson AM, Ross MW, Nyoni JE, McCurdy SA. High prevalence of stigma-related  
29  
30 abuse among a sample of men who have sex with men in Tanzania: implications for HIV  
31  
32 prevention. *AIDS Care.* 2014;27(1):63–70. doi:10.1080/09540121.2014.951597  
33  
34  
35 20. Kim HY, Grosso A, Ky-Zerbo O, *et al.* Stigma as a barrier to health care utilization  
36  
37 among female sex workers and men who have sex with men in Burkina Faso. *Ann*  
38  
39 *Epidemiol.* 2018;28(1):13-9.  
40  
41  
42 21. Bwambale FM, Ssali SN, Byaruhanga S, Kalyango JN, Karamagi CA. Voluntary HIV  
43  
44 Counselling and Testing among Men in Rural Western Uganda: Implications for HIV  
45  
46 Prevention. *BMC Public Health.* 2008; 8(1):263-276.  
47  
48  
49 22. Nelson LE, McMahon J, Zhang N, Adu-Sarkodie Y, Mayer KH. Exploring HIV, same-  
50  
51 sex and gender non-conformity stigmas and delays in HIV diagnosis, linkage and  
52  
53 retention for MSM in Ghana. National Institute of Mental Health; 2016.  
54  
55  
56  
57  
58  
59  
60

- 1  
2  
3  
4  
5  
6  
7  
8  
9  
10  
11  
12  
13  
14  
15  
16  
17  
18  
19  
20  
21  
22  
23  
24  
25  
26  
27  
28  
29  
30  
31  
32  
33  
34  
35  
36  
37  
38  
39  
40  
41  
42  
43  
44  
45  
46  
47  
48  
49  
50  
51  
52  
53  
54  
55  
56  
57  
58  
59  
60
23. Holtzman S, Landis L, Walsh Z, Puterman E, Roberts D, Saya-Moore K. Predictors of HIV testing among men who have sex with men: a focus on men living outside major urban centres in Canada. *AIDS care*. 2016;28(6):705-11.
  24. Turan JM, Elafros MA, Logie CH, *et al*. Challenges and opportunities in examining and addressing intersectional stigma and health. *BMC medicine*. 2019;17(1):7-7. <https://doi.org/10.1186/s12916-018-1246-9>
  25. Tricco AC, Lillie E, Zari W, *et al*. PRISMA extension for scoping reviews (PRISMA-ScR): checklist and explanation. *Ann Intern Med*. 2018;169(7):467-473. doi:10.7326/M18-0850.
  26. Yale University Institutional Review Boards. IRB Policy 100 Institutional Review Board (IRB) Review of Human Subject Research Protocols or FDA- Regulated Activities Involving Human Participants. New Haven: USA; 2018.
  27. Mburu G, Igbinedion E, Lim SH, *et al* Outcomes of HIV treatment from the private sector in low-income and middle-income countries: a systematic review protocol *BMJ Open*. 2020;10:e031844. doi: 10.1136/bmjopen-2019-031844
  28. UNICEF. The State of the World's Children 1996 Report. New York: USA; 1996. Available at <https://www.unicef.org/sowc96/groups.htm>.
  29. Grossman AH. Gay men and HIV/AIDS: understanding the double stigma. *J Assoc Nurses AIDS Care*. 1991;2(4):28-32.
  30. Covidence systematic review software, Veritas Health Innovation, Melbourne, Australia. Available at [www.covidence.org](http://www.covidence.org). 2019.

- 1  
2  
3  
4  
5  
6  
7  
8  
9  
10  
11  
12  
13  
14  
15  
16  
17  
18  
19  
20  
21  
22  
23  
24  
25  
26  
27  
28  
29  
30  
31  
32  
33  
34  
35  
36  
37  
38  
39  
40  
41  
42  
43  
44  
45  
46  
47  
48  
49  
50  
51  
52  
53  
54  
55  
56  
57  
58  
59  
60
31. Belur J, Tompson L, Thornton A, Simon M. Interrater Reliability in Systematic Review Methodology: Exploring Variation in Coder Decision-Making. *Sociological Methods & Research*. September 2018. doi:10.1177/0049124118799372
32. Risher K, Adams D, Sithole B, *et al*. Sexual stigma and discrimination as barriers to seeking appropriate healthcare among men who have sex with men in Swaziland. *Journal of the International AIDS Society*. 2013;16(3 Suppl 2):18715-18715.
33. Turan JM, Elafros MA, Logie CH, *et al*. Challenges and opportunities in examining and addressing intersectional stigma and health. *BMC medicine*. 2019;17(1):7-7.
34. Eichenberger A, Weisser M, Battegay M. [HIV in Sub-Saharan Africa: Where Are We Today?]. *Praxis (Bern 1994)*. Nov 2019;108(15):971-976.
35. Kharsany ABM, Karim QA. HIV Infection and AIDS in Sub-Saharan Africa: Current Status, Challenges and Opportunities. *The open AIDS journal*. 2016;10:34-48.
36. Ortblad KF, Baeten JM, Cherutich P, Wamwicwe JN, Wasserheit JN. The arc of HIV epidemics in sub-Saharan Africa: new challenges with concentrating epidemics in the era of 90-90-90. *Current opinion in HIV and AIDS*. 2019;14(5):354-365.

## Ovid MEDLINE(R) ALL &lt;1946 to November 23, 2020&gt;

Search history sorted by search number ascending

| #  | Searches                                                                             | Results |
|----|--------------------------------------------------------------------------------------|---------|
| 1  | [Gamji MEDLINE draft 20201124]                                                       | 0       |
| 2  | [queries from Kate's project with Sarah Abboud project, edited to focus on MSM, WSW] | 0       |
| 3  | bicurious.mp.                                                                        | 3       |
| 4  | bisexual*.mp.                                                                        | 10791   |
| 5  | gay.mp.                                                                              | 11636   |
| 6  | gays.mp.                                                                             | 460     |
| 7  | gender minorit*.mp.                                                                  | 4618    |
| 8  | gender queer.mp.                                                                     | 17      |
| 9  | GLB.mp.                                                                              | 409     |
| 10 | GLBQ.mp.                                                                             | 3       |
| 11 | GLBs.mp.                                                                             | 16      |
| 12 | GLBT.mp.                                                                             | 101     |
| 13 | GLBTQ.mp.                                                                            | 14      |
| 14 | heteroflexible.mp.                                                                   | 3       |
| 15 | homosexual*.mp.                                                                      | 35679   |
| 16 | lesbian*.mp.                                                                         | 7061    |
| 17 | lesbigay*.mp.                                                                        | 5       |
| 18 | LGB.mp.                                                                              | 1038    |
| 19 | LGBQ.mp.                                                                             | 112     |
| 20 | LGBS.mp.                                                                             | 68      |
| 21 | LGBT*.mp.                                                                            | 2652    |
| 22 | men who have sex with men.mp.                                                        | 11941   |
| 23 | mostly-heterosexual.mp.                                                              | 124     |
| 24 | MSM.mp.                                                                              | 10713   |
| 25 | MSMW.mp.                                                                             | 121     |
| 26 | nonheterosexual*.mp.                                                                 | 151     |
| 27 | non-heterosexual*.mp.                                                                | 279     |
| 28 | queer.mp.                                                                            | 1400    |
| 29 | queers.mp.                                                                           | 26      |
| 30 | same gender loving.mp.                                                               | 7       |
| 31 | same sex couple*.mp.                                                                 | 359     |
| 32 | same sex relations*.mp.                                                              | 324     |
| 33 | same-sex attract*.mp.                                                                | 297     |
| 34 | sexual identit*.mp.                                                                  | 1865    |
| 35 | sexual minorit*.mp.                                                                  | 2860    |
| 36 | sexual orientation*.mp.                                                              | 6157    |
| 37 | sexual preference*.mp.                                                               | 639     |
| 38 | SGM.mp.                                                                              | 603     |
| 39 | women loving women.mp.                                                               | 8       |
| 40 | women who have sex with women.mp.                                                    | 179     |
| 41 | WSW.mp.                                                                              | 153     |

|    |    |                                                                                                                                                                                                                                                                                                                                                                                                                                                                                                                                                                                                                                                                                                                                                                                                                                                                                                                                                                                                                                                                                                                                                                                                                                                                                                                                                                                                                                                                                                                           |         |
|----|----|---------------------------------------------------------------------------------------------------------------------------------------------------------------------------------------------------------------------------------------------------------------------------------------------------------------------------------------------------------------------------------------------------------------------------------------------------------------------------------------------------------------------------------------------------------------------------------------------------------------------------------------------------------------------------------------------------------------------------------------------------------------------------------------------------------------------------------------------------------------------------------------------------------------------------------------------------------------------------------------------------------------------------------------------------------------------------------------------------------------------------------------------------------------------------------------------------------------------------------------------------------------------------------------------------------------------------------------------------------------------------------------------------------------------------------------------------------------------------------------------------------------------------|---------|
| 1  |    |                                                                                                                                                                                                                                                                                                                                                                                                                                                                                                                                                                                                                                                                                                                                                                                                                                                                                                                                                                                                                                                                                                                                                                                                                                                                                                                                                                                                                                                                                                                           |         |
| 2  | 42 | WSWM.mp.                                                                                                                                                                                                                                                                                                                                                                                                                                                                                                                                                                                                                                                                                                                                                                                                                                                                                                                                                                                                                                                                                                                                                                                                                                                                                                                                                                                                                                                                                                                  | 18      |
| 3  | 43 | "sexual and gender minorities"/                                                                                                                                                                                                                                                                                                                                                                                                                                                                                                                                                                                                                                                                                                                                                                                                                                                                                                                                                                                                                                                                                                                                                                                                                                                                                                                                                                                                                                                                                           | 4045    |
| 4  | 44 | bisexuality/                                                                                                                                                                                                                                                                                                                                                                                                                                                                                                                                                                                                                                                                                                                                                                                                                                                                                                                                                                                                                                                                                                                                                                                                                                                                                                                                                                                                                                                                                                              | 4227    |
| 5  | 45 | exp homosexuality/                                                                                                                                                                                                                                                                                                                                                                                                                                                                                                                                                                                                                                                                                                                                                                                                                                                                                                                                                                                                                                                                                                                                                                                                                                                                                                                                                                                                                                                                                                        | 30137   |
| 6  | 46 | or/2-45 [population terms]                                                                                                                                                                                                                                                                                                                                                                                                                                                                                                                                                                                                                                                                                                                                                                                                                                                                                                                                                                                                                                                                                                                                                                                                                                                                                                                                                                                                                                                                                                | 54126   |
| 7  | 47 | stigma*.mp.                                                                                                                                                                                                                                                                                                                                                                                                                                                                                                                                                                                                                                                                                                                                                                                                                                                                                                                                                                                                                                                                                                                                                                                                                                                                                                                                                                                                                                                                                                               | 40591   |
| 8  | 48 | social stigma/                                                                                                                                                                                                                                                                                                                                                                                                                                                                                                                                                                                                                                                                                                                                                                                                                                                                                                                                                                                                                                                                                                                                                                                                                                                                                                                                                                                                                                                                                                            | 8811    |
| 9  | 49 | exp shame/                                                                                                                                                                                                                                                                                                                                                                                                                                                                                                                                                                                                                                                                                                                                                                                                                                                                                                                                                                                                                                                                                                                                                                                                                                                                                                                                                                                                                                                                                                                | 2458    |
| 10 | 50 | [terms from<br><a href="https://www.cochranelibrary.com/cdsr/doi/10.1002/14651858.CD009453.pub2/appendices#CD009453-sec1-0012">https://www.cochranelibrary.com/cdsr/doi/10.1002/14651858.CD009453.pub2/appendices#CD009453-sec1-0012</a> , Clement 2013, with my edits]                                                                                                                                                                                                                                                                                                                                                                                                                                                                                                                                                                                                                                                                                                                                                                                                                                                                                                                                                                                                                                                                                                                                                                                                                                                   | 0       |
| 11 | 51 | stereotyping/                                                                                                                                                                                                                                                                                                                                                                                                                                                                                                                                                                                                                                                                                                                                                                                                                                                                                                                                                                                                                                                                                                                                                                                                                                                                                                                                                                                                                                                                                                             | 11095   |
| 12 | 52 | (stereotyp* or stigma* or label* or negative image* or ignoran* or misconception* or<br>misperception* or ((public* or community or social or popular) adj perception*)).mp.                                                                                                                                                                                                                                                                                                                                                                                                                                                                                                                                                                                                                                                                                                                                                                                                                                                                                                                                                                                                                                                                                                                                                                                                                                                                                                                                              | 753541  |
| 13 | 53 | social perception/                                                                                                                                                                                                                                                                                                                                                                                                                                                                                                                                                                                                                                                                                                                                                                                                                                                                                                                                                                                                                                                                                                                                                                                                                                                                                                                                                                                                                                                                                                        | 23528   |
| 14 | 54 | public opinion/                                                                                                                                                                                                                                                                                                                                                                                                                                                                                                                                                                                                                                                                                                                                                                                                                                                                                                                                                                                                                                                                                                                                                                                                                                                                                                                                                                                                                                                                                                           | 18779   |
| 15 | 55 | prejudice/ or homophobia/                                                                                                                                                                                                                                                                                                                                                                                                                                                                                                                                                                                                                                                                                                                                                                                                                                                                                                                                                                                                                                                                                                                                                                                                                                                                                                                                                                                                                                                                                                 | 25301   |
| 16 | 56 | ((public* or community or social or popular or religious) adj attitude*).mp.                                                                                                                                                                                                                                                                                                                                                                                                                                                                                                                                                                                                                                                                                                                                                                                                                                                                                                                                                                                                                                                                                                                                                                                                                                                                                                                                                                                                                                              | 3305    |
| 17 | 57 | ((negative or positive or chang*) adj3 attitude*) or prejudice* or hostile* or intoleran*).mp.                                                                                                                                                                                                                                                                                                                                                                                                                                                                                                                                                                                                                                                                                                                                                                                                                                                                                                                                                                                                                                                                                                                                                                                                                                                                                                                                                                                                                            | 120023  |
| 18 | 58 | social distance/                                                                                                                                                                                                                                                                                                                                                                                                                                                                                                                                                                                                                                                                                                                                                                                                                                                                                                                                                                                                                                                                                                                                                                                                                                                                                                                                                                                                                                                                                                          | 3087    |
| 19 | 59 | (social adj1 (distance or acceptance or rejection)).mp.                                                                                                                                                                                                                                                                                                                                                                                                                                                                                                                                                                                                                                                                                                                                                                                                                                                                                                                                                                                                                                                                                                                                                                                                                                                                                                                                                                                                                                                                   | 5379    |
| 20 | 60 | rejection, psychology/                                                                                                                                                                                                                                                                                                                                                                                                                                                                                                                                                                                                                                                                                                                                                                                                                                                                                                                                                                                                                                                                                                                                                                                                                                                                                                                                                                                                                                                                                                    | 1605    |
| 21 | 61 | (discriminat* or marginali* or rejecting behavi* or injustice* or (social adj (distance or justice<br>or rejection or acceptance or exclusion or inclusion))).mp.                                                                                                                                                                                                                                                                                                                                                                                                                                                                                                                                                                                                                                                                                                                                                                                                                                                                                                                                                                                                                                                                                                                                                                                                                                                                                                                                                         | 296664  |
| 22 | 62 | [additions based on <a href="https://bmcpublikealth.biomedcentral.com/articles/10.1186/s12889-018-5861-3">https://bmcpublikealth.biomedcentral.com/articles/10.1186/s12889-018-5861-3</a> , Jackson-Best 2018]                                                                                                                                                                                                                                                                                                                                                                                                                                                                                                                                                                                                                                                                                                                                                                                                                                                                                                                                                                                                                                                                                                                                                                                                                                                                                                            | 0       |
| 23 | 63 | social discrimination/                                                                                                                                                                                                                                                                                                                                                                                                                                                                                                                                                                                                                                                                                                                                                                                                                                                                                                                                                                                                                                                                                                                                                                                                                                                                                                                                                                                                                                                                                                    | 1281    |
| 24 | 64 | or/47-63 [stigma terms]                                                                                                                                                                                                                                                                                                                                                                                                                                                                                                                                                                                                                                                                                                                                                                                                                                                                                                                                                                                                                                                                                                                                                                                                                                                                                                                                                                                                                                                                                                   | 1154251 |
| 25 | 65 | [the Sub-Saharan Africa hedge from the Canadian Health Libraries Association<br><a href="https://extranet.santecom.qc.ca/wiki/!biblio3s/doku.php?id=concepts:afrique-subsaaharienne">https://extranet.santecom.qc.ca/wiki/!biblio3s/doku.php?id=concepts:afrique-subsaaharienne</a> ]                                                                                                                                                                                                                                                                                                                                                                                                                                                                                                                                                                                                                                                                                                                                                                                                                                                                                                                                                                                                                                                                                                                                                                                                                                     | 0       |
| 26 | 66 | Africa South of the Sahara/ or Angola/ or Benin/ or Botswana/ or Burkina Faso/ or Burundi/<br>or Cameroon/ or Cape Verde/ or Central African Republic/ or Chad/ or Comoros/ or Congo/<br>or Brazzaville/ or Cote d'Ivoire/ or Djibouti/ or Equatorial Guinea/ or Eritrea/ or Ethiopia/ or<br>Gabon/ or Gambia/ or Ghana/ or Guinea/ or Bissau/ or Kenya/ or Lesotho/ or Liberia/ or<br>Madagascar/ or Malawi/ or Mali/ or Mauritania/ or Mauritius/ or Mozambique/ or Namibia/ or<br>Niger/ or Nigeria/ or Rwanda/ or Sao Tome e Principe/ or Senegal/ or Seychelles/ or Sierra<br>Leone/ or Somalia/ or South Africa/ or South Sudan/ or Sudan/ or Swaziland/ or Tanzania/<br>or Togo/ or Uganda/ or Western Sahara/ or Zaire/ or Zambia/ or Zimbabwe/ or (Angola or<br>Benin or Botswana or Bobo-Dioulasso or Burkina Faso or Burundi or Cameroon or Cape<br>Verde or Central African Republic or Chad or Comoros or Congo or Brazzaville or Cote<br>d'Ivoire or Djibouti or Equatorial Guinea or Eritrea or Ethiopia or Gabon or Gambia or<br>Ghana or Guinea or Bissau or Kenya or Lesotho or Liberia or Madagascar or Malawi or<br>Mali or Mauritania or Mauritius or Mozambique or Namibia or Niger or Nigeria or Rwanda<br>or Sao Tome e Principe or Senegal or Seychelles or Sierra Leone or Somalia or South<br>Africa or South Sudan or Sudan or Swaziland or Tanzania or Togo or Uganda or Western<br>Sahara or Zaire or Zambia or Zimbabwe or "Africa South of the Sahara" or "Sub-Saharan<br>Africa").tw,kw. | 397719  |
| 27 | 67 | [adjustments]                                                                                                                                                                                                                                                                                                                                                                                                                                                                                                                                                                                                                                                                                                                                                                                                                                                                                                                                                                                                                                                                                                                                                                                                                                                                                                                                                                                                                                                                                                             | 0       |
| 28 |    |                                                                                                                                                                                                                                                                                                                                                                                                                                                                                                                                                                                                                                                                                                                                                                                                                                                                                                                                                                                                                                                                                                                                                                                                                                                                                                                                                                                                                                                                                                                           |         |
| 29 |    |                                                                                                                                                                                                                                                                                                                                                                                                                                                                                                                                                                                                                                                                                                                                                                                                                                                                                                                                                                                                                                                                                                                                                                                                                                                                                                                                                                                                                                                                                                                           |         |
| 30 |    |                                                                                                                                                                                                                                                                                                                                                                                                                                                                                                                                                                                                                                                                                                                                                                                                                                                                                                                                                                                                                                                                                                                                                                                                                                                                                                                                                                                                                                                                                                                           |         |
| 31 |    |                                                                                                                                                                                                                                                                                                                                                                                                                                                                                                                                                                                                                                                                                                                                                                                                                                                                                                                                                                                                                                                                                                                                                                                                                                                                                                                                                                                                                                                                                                                           |         |
| 32 |    |                                                                                                                                                                                                                                                                                                                                                                                                                                                                                                                                                                                                                                                                                                                                                                                                                                                                                                                                                                                                                                                                                                                                                                                                                                                                                                                                                                                                                                                                                                                           |         |
| 33 |    |                                                                                                                                                                                                                                                                                                                                                                                                                                                                                                                                                                                                                                                                                                                                                                                                                                                                                                                                                                                                                                                                                                                                                                                                                                                                                                                                                                                                                                                                                                                           |         |
| 34 |    |                                                                                                                                                                                                                                                                                                                                                                                                                                                                                                                                                                                                                                                                                                                                                                                                                                                                                                                                                                                                                                                                                                                                                                                                                                                                                                                                                                                                                                                                                                                           |         |
| 35 |    |                                                                                                                                                                                                                                                                                                                                                                                                                                                                                                                                                                                                                                                                                                                                                                                                                                                                                                                                                                                                                                                                                                                                                                                                                                                                                                                                                                                                                                                                                                                           |         |
| 36 |    |                                                                                                                                                                                                                                                                                                                                                                                                                                                                                                                                                                                                                                                                                                                                                                                                                                                                                                                                                                                                                                                                                                                                                                                                                                                                                                                                                                                                                                                                                                                           |         |
| 37 |    |                                                                                                                                                                                                                                                                                                                                                                                                                                                                                                                                                                                                                                                                                                                                                                                                                                                                                                                                                                                                                                                                                                                                                                                                                                                                                                                                                                                                                                                                                                                           |         |
| 38 |    |                                                                                                                                                                                                                                                                                                                                                                                                                                                                                                                                                                                                                                                                                                                                                                                                                                                                                                                                                                                                                                                                                                                                                                                                                                                                                                                                                                                                                                                                                                                           |         |
| 39 |    |                                                                                                                                                                                                                                                                                                                                                                                                                                                                                                                                                                                                                                                                                                                                                                                                                                                                                                                                                                                                                                                                                                                                                                                                                                                                                                                                                                                                                                                                                                                           |         |
| 40 |    |                                                                                                                                                                                                                                                                                                                                                                                                                                                                                                                                                                                                                                                                                                                                                                                                                                                                                                                                                                                                                                                                                                                                                                                                                                                                                                                                                                                                                                                                                                                           |         |
| 41 |    |                                                                                                                                                                                                                                                                                                                                                                                                                                                                                                                                                                                                                                                                                                                                                                                                                                                                                                                                                                                                                                                                                                                                                                                                                                                                                                                                                                                                                                                                                                                           |         |
| 42 |    |                                                                                                                                                                                                                                                                                                                                                                                                                                                                                                                                                                                                                                                                                                                                                                                                                                                                                                                                                                                                                                                                                                                                                                                                                                                                                                                                                                                                                                                                                                                           |         |
| 43 |    |                                                                                                                                                                                                                                                                                                                                                                                                                                                                                                                                                                                                                                                                                                                                                                                                                                                                                                                                                                                                                                                                                                                                                                                                                                                                                                                                                                                                                                                                                                                           |         |
| 44 |    |                                                                                                                                                                                                                                                                                                                                                                                                                                                                                                                                                                                                                                                                                                                                                                                                                                                                                                                                                                                                                                                                                                                                                                                                                                                                                                                                                                                                                                                                                                                           |         |
| 45 |    |                                                                                                                                                                                                                                                                                                                                                                                                                                                                                                                                                                                                                                                                                                                                                                                                                                                                                                                                                                                                                                                                                                                                                                                                                                                                                                                                                                                                                                                                                                                           |         |
| 46 |    |                                                                                                                                                                                                                                                                                                                                                                                                                                                                                                                                                                                                                                                                                                                                                                                                                                                                                                                                                                                                                                                                                                                                                                                                                                                                                                                                                                                                                                                                                                                           |         |
| 47 |    |                                                                                                                                                                                                                                                                                                                                                                                                                                                                                                                                                                                                                                                                                                                                                                                                                                                                                                                                                                                                                                                                                                                                                                                                                                                                                                                                                                                                                                                                                                                           |         |
| 48 |    |                                                                                                                                                                                                                                                                                                                                                                                                                                                                                                                                                                                                                                                                                                                                                                                                                                                                                                                                                                                                                                                                                                                                                                                                                                                                                                                                                                                                                                                                                                                           |         |
| 49 |    |                                                                                                                                                                                                                                                                                                                                                                                                                                                                                                                                                                                                                                                                                                                                                                                                                                                                                                                                                                                                                                                                                                                                                                                                                                                                                                                                                                                                                                                                                                                           |         |
| 50 |    |                                                                                                                                                                                                                                                                                                                                                                                                                                                                                                                                                                                                                                                                                                                                                                                                                                                                                                                                                                                                                                                                                                                                                                                                                                                                                                                                                                                                                                                                                                                           |         |
| 51 |    |                                                                                                                                                                                                                                                                                                                                                                                                                                                                                                                                                                                                                                                                                                                                                                                                                                                                                                                                                                                                                                                                                                                                                                                                                                                                                                                                                                                                                                                                                                                           |         |
| 52 |    |                                                                                                                                                                                                                                                                                                                                                                                                                                                                                                                                                                                                                                                                                                                                                                                                                                                                                                                                                                                                                                                                                                                                                                                                                                                                                                                                                                                                                                                                                                                           |         |
| 53 |    |                                                                                                                                                                                                                                                                                                                                                                                                                                                                                                                                                                                                                                                                                                                                                                                                                                                                                                                                                                                                                                                                                                                                                                                                                                                                                                                                                                                                                                                                                                                           |         |
| 54 |    |                                                                                                                                                                                                                                                                                                                                                                                                                                                                                                                                                                                                                                                                                                                                                                                                                                                                                                                                                                                                                                                                                                                                                                                                                                                                                                                                                                                                                                                                                                                           |         |
| 55 |    |                                                                                                                                                                                                                                                                                                                                                                                                                                                                                                                                                                                                                                                                                                                                                                                                                                                                                                                                                                                                                                                                                                                                                                                                                                                                                                                                                                                                                                                                                                                           |         |
| 56 |    |                                                                                                                                                                                                                                                                                                                                                                                                                                                                                                                                                                                                                                                                                                                                                                                                                                                                                                                                                                                                                                                                                                                                                                                                                                                                                                                                                                                                                                                                                                                           |         |
| 57 |    |                                                                                                                                                                                                                                                                                                                                                                                                                                                                                                                                                                                                                                                                                                                                                                                                                                                                                                                                                                                                                                                                                                                                                                                                                                                                                                                                                                                                                                                                                                                           |         |
| 58 |    |                                                                                                                                                                                                                                                                                                                                                                                                                                                                                                                                                                                                                                                                                                                                                                                                                                                                                                                                                                                                                                                                                                                                                                                                                                                                                                                                                                                                                                                                                                                           |         |
| 59 |    |                                                                                                                                                                                                                                                                                                                                                                                                                                                                                                                                                                                                                                                                                                                                                                                                                                                                                                                                                                                                                                                                                                                                                                                                                                                                                                                                                                                                                                                                                                                           |         |
| 60 |    |                                                                                                                                                                                                                                                                                                                                                                                                                                                                                                                                                                                                                                                                                                                                                                                                                                                                                                                                                                                                                                                                                                                                                                                                                                                                                                                                                                                                                                                                                                                           |         |

|    |                                                                                                                                                                                                                                                                                                                                                                                                                                                                                                                                                                                                                                                                                                                                                                                                                      |         |
|----|----------------------------------------------------------------------------------------------------------------------------------------------------------------------------------------------------------------------------------------------------------------------------------------------------------------------------------------------------------------------------------------------------------------------------------------------------------------------------------------------------------------------------------------------------------------------------------------------------------------------------------------------------------------------------------------------------------------------------------------------------------------------------------------------------------------------|---------|
| 68 | (Angola* or Benin* or Botswana* or Bobo-Dioulasso or Burkin* or Burundi* or Camero* or Cape Verdean* or Cabo Verde* or Central African* or Chad* or Comoros or Congo* or Brazzaville or Cote d'Ivoir* or Ivory Coast or Djibouti* or Equatorial Guinea* or Eritrea* or Ethiopia* or Gabon* or Gambia* or Ghana* or Guinea* or Kenya* or Lesoth* or Liberia* or Malagas* or Malawi* or Mali* or Mauritania* or Mauriti* or Mozambic* or Namibia* or Niger* or Nigeria* or Rwanda* or Sao Tomean* or Santomean* or Senegal* or Seychelloi* or Sierra Leone* or Somalia* or South Africa* or South Sudan* or Sudan* or Swazi* or Tanzania* or Togol* or Uganda* or Western Sahara or Zair* or Zambia* or Zimbabwe* or "Africa South of the Sahara" or Sub-Saharan or subsaharan or west africa* or east africa*).mp,jw. | 1115946 |
| 69 | exp africa south of the sahara/                                                                                                                                                                                                                                                                                                                                                                                                                                                                                                                                                                                                                                                                                                                                                                                      | 213254  |
| 70 | or/65-69 [geography terms]                                                                                                                                                                                                                                                                                                                                                                                                                                                                                                                                                                                                                                                                                                                                                                                           | 1136991 |
| 71 | 46 and 64 and 70                                                                                                                                                                                                                                                                                                                                                                                                                                                                                                                                                                                                                                                                                                                                                                                                     | 439     |
| 72 | "Stigma and discrimination experiences of HIV-positive men who have sex with men in Cape Town, South Africa ".ti.                                                                                                                                                                                                                                                                                                                                                                                                                                                                                                                                                                                                                                                                                                    | 1       |
| 73 | "intersecting stigmas and the positive health, dignity and prevention needs of HIV-positive men who have sex with men in Swaziland".ti.                                                                                                                                                                                                                                                                                                                                                                                                                                                                                                                                                                                                                                                                              | 1       |
| 74 | "Sexual behavior stigma and depression among transgender women and cisgender men who have sex with men".ti.                                                                                                                                                                                                                                                                                                                                                                                                                                                                                                                                                                                                                                                                                                          | 1       |
| 75 | "Stretching the Boundaries: Tanzanian Pharmacy Workers' Views and Experiences of Providing STI Services for Men Who Have Sex with Men".ti.                                                                                                                                                                                                                                                                                                                                                                                                                                                                                                                                                                                                                                                                           | 1       |
| 76 | "Healthcare experiences of lesbian and bisexual women in Cape Town, South Africa".ti.                                                                                                                                                                                                                                                                                                                                                                                                                                                                                                                                                                                                                                                                                                                                | 1       |
| 77 | "Suicidal ideation among MSM in three West African countries: Associations with stigma and social capital".ti.                                                                                                                                                                                                                                                                                                                                                                                                                                                                                                                                                                                                                                                                                                       | 1       |
| 78 | or/72-77 [validation articles from Dada and Kate]                                                                                                                                                                                                                                                                                                                                                                                                                                                                                                                                                                                                                                                                                                                                                                    | 6       |
| 79 | 78 and 71                                                                                                                                                                                                                                                                                                                                                                                                                                                                                                                                                                                                                                                                                                                                                                                                            | 6       |



**PRISMA-P (Preferred Reporting Items for Systematic review and Meta-Analysis Protocols) 2015 checklist: recommended items to address in a systematic review protocol\***

| Section and topic                 | Item No | Checklist item                                                                                                                                                                                                                | Reported on Page # |
|-----------------------------------|---------|-------------------------------------------------------------------------------------------------------------------------------------------------------------------------------------------------------------------------------|--------------------|
| <b>ADMINISTRATIVE INFORMATION</b> |         |                                                                                                                                                                                                                               |                    |
| Title:                            |         |                                                                                                                                                                                                                               |                    |
| Identification                    | 1a      | Identify the report as a protocol of a systematic review                                                                                                                                                                      | 1                  |
| Update                            | 1b      | If the protocol is for an update of a previous systematic review, identify as such                                                                                                                                            | N/A                |
| Registration                      | 2       | If registered, provide the name of the registry (such as PROSPERO) and registration number                                                                                                                                    | N/A                |
| Authors:                          |         |                                                                                                                                                                                                                               |                    |
| Contact                           | 3a      | Provide name, institutional affiliation, e-mail address of all protocol authors; provide physical mailing address of corresponding author                                                                                     | ScholarOne         |
| Contributions                     | 3b      | Describe contributions of protocol authors and identify the guarantor of the review                                                                                                                                           | N/A                |
| Amendments                        | 4       | If the protocol represents an amendment of a previously completed or published protocol, identify as such and list changes; otherwise, state plan for documenting important protocol amendments                               | N/A                |
| Support:                          |         |                                                                                                                                                                                                                               |                    |
| Sources                           | 5a      | Indicate sources of financial or other support for the review                                                                                                                                                                 | 13                 |
| Sponsor                           | 5b      | Provide name for the review funder and/or sponsor                                                                                                                                                                             | 13                 |
| Role of sponsor or funder         | 5c      | Describe roles of funder(s), sponsor(s), and/or institution(s), if any, in developing the protocol                                                                                                                            | N/A                |
| <b>INTRODUCTION</b>               |         |                                                                                                                                                                                                                               |                    |
| Rationale                         | 6       | Describe the rationale for the review in the context of what is already known                                                                                                                                                 | 4-6                |
| Objectives                        | 7       | Provide an explicit statement of the question(s) the review will address with reference to participants, interventions, comparators, and outcomes (PICO)                                                                      | 6                  |
| <b>METHODS</b>                    |         |                                                                                                                                                                                                                               |                    |
| Eligibility criteria              | 8       | Specify the study characteristics (such as PICO, study design, setting, time frame) and report characteristics (such as years considered, language, publication status) to be used as criteria for eligibility for the review | 7-8                |
| Information sources               | 9       | Describe all intended information sources (such as electronic databases, contact with study authors, trial registers or other grey literature sources) with planned dates of coverage                                         | 8-9                |

|                                    |     |                                                                                                                                                                                                                                                  |       |
|------------------------------------|-----|--------------------------------------------------------------------------------------------------------------------------------------------------------------------------------------------------------------------------------------------------|-------|
| Search strategy                    | 10  | Present draft of search strategy to be used for at least one electronic database, including planned limits, such that it could be repeated                                                                                                       | 13-14 |
| Study records:                     |     |                                                                                                                                                                                                                                                  |       |
| Data management                    | 11a | Describe the mechanism(s) that will be used to manage records and data throughout the review                                                                                                                                                     | 9     |
| Selection process                  | 11b | State the process that will be used for selecting studies (such as two independent reviewers) through each phase of the review (that is, screening, eligibility and inclusion in meta-analysis)                                                  | 9     |
| Data collection process            | 11c | Describe planned method of extracting data from reports (such as piloting forms, done independently, in duplicate), any processes for obtaining and confirming data from investigators                                                           | 10-11 |
| Data items                         | 12  | List and define all variables for which data will be sought (such as PICO items, funding sources), any pre-planned data assumptions and simplifications                                                                                          | 10-11 |
| Outcomes and prioritization        | 13  | List and define all outcomes for which data will be sought, including prioritization of main and additional outcomes, with rationale                                                                                                             | 11    |
| Risk of bias in individual studies | 14  | Describe anticipated methods for assessing risk of bias of individual studies, including whether this will be done at the outcome or study level, or both; state how this information will be used in data synthesis                             | N/A   |
| Data synthesis                     | 15a | Describe criteria under which study data will be quantitatively synthesised                                                                                                                                                                      | N/A   |
|                                    | 15b | If data are appropriate for quantitative synthesis, describe planned summary measures, methods of handling data and methods of combining data from studies, including any planned exploration of consistency (such as $I^2$ , Kendall's $\tau$ ) | N/A   |
|                                    | 15c | Describe any proposed additional analyses (such as sensitivity or subgroup analyses, meta-regression)                                                                                                                                            | N/A   |
|                                    | 15d | If quantitative synthesis is not appropriate, describe the type of summary planned                                                                                                                                                               | 11    |
| Meta-bias(es)                      | 16  | Specify any planned assessment of meta-bias(es) (such as publication bias across studies, selective reporting within studies)                                                                                                                    | 11    |
| Confidence in cumulative evidence  | 17  | Describe how the strength of the body of evidence will be assessed (such as GRADE)                                                                                                                                                               | N/A   |

**\* It is strongly recommended that this checklist be read in conjunction with the PRISMA-P Explanation and Elaboration (cite when available) for important clarification on the items. Amendments to a review protocol should be tracked and dated. The copyright for PRISMA-P (including checklist) is held by the PRISMA-P Group and is distributed under a Creative Commons Attribution Licence 4.0.**

*From: Shamseer L, Moher D, Clarke M, Ghersi D, Liberati A, Petticrew M, Shekelle P, Stewart L, PRISMA-P Group. Preferred reporting items for systematic review and meta-analysis protocols (PRISMA-P) 2015: elaboration and explanation. BMJ. 2015 Jan 2;349(jan02 1):g7647.*

1  
2  
3  
4  
5  
6  
7  
8  
9  
10  
11  
12  
13  
14  
15  
16  
17  
18  
19  
20  
21  
22  
23  
24  
25  
26  
27  
28  
29  
30  
31  
32  
33  
34  
35  
36  
37  
38  
39  
40  
41  
42  
43  
44  
45  
46

For peer review only

# BMJ Open

## Intersectional stigma and its impact on HIV prevention and care among MSM and WSW in sub-Saharan African countries: A protocol for a scoping review

|                                 |                                                                                                                                                                                                                                                                                                                                                                                                                                                                                                                                                                                                                                                                                                                                                                                                            |
|---------------------------------|------------------------------------------------------------------------------------------------------------------------------------------------------------------------------------------------------------------------------------------------------------------------------------------------------------------------------------------------------------------------------------------------------------------------------------------------------------------------------------------------------------------------------------------------------------------------------------------------------------------------------------------------------------------------------------------------------------------------------------------------------------------------------------------------------------|
| Journal:                        | <i>BMJ Open</i>                                                                                                                                                                                                                                                                                                                                                                                                                                                                                                                                                                                                                                                                                                                                                                                            |
| Manuscript ID                   | bmjopen-2020-047280.R1                                                                                                                                                                                                                                                                                                                                                                                                                                                                                                                                                                                                                                                                                                                                                                                     |
| Article Type:                   | Protocol                                                                                                                                                                                                                                                                                                                                                                                                                                                                                                                                                                                                                                                                                                                                                                                                   |
| Date Submitted by the Author:   | 22-Apr-2021                                                                                                                                                                                                                                                                                                                                                                                                                                                                                                                                                                                                                                                                                                                                                                                                |
| Complete List of Authors:       | Abubakari, Gamji M'Rabiu; Yale University School of Public Health, Center for Interdisciplinary Research on AIDS<br>Dada, Debbie; Yale University School of Nursing; St Michael's Hospital Centre for Urban Health Solutions<br>Nur, Jemal; St Michael's Hospital Centre for Urban Health Solutions, Turner, DeAnne; Center for Interdisciplinary Research on AIDS<br>Otchere, Amma; Yale University School of Nursing<br>Tanis, Leonne; Yale University School of Nursing<br>Ni, Zhao; Yale University School of Medicine<br>Mashoud, Ibrahim; 37 Military Hospital<br>Nyhan, Kate; Yale University, Harvey Cushing/John Hay Whitney Medical Library<br>Nyblade, Laura; RTI International<br>Nelson, Laron; Yale University School of Nursing, ; St Michael's Hospital Centre for Urban Health Solutions, |
| <b>Primary Subject Heading</b>: | HIV/AIDS                                                                                                                                                                                                                                                                                                                                                                                                                                                                                                                                                                                                                                                                                                                                                                                                   |
| Secondary Subject Heading:      | Health services research, Public health, Sexual health                                                                                                                                                                                                                                                                                                                                                                                                                                                                                                                                                                                                                                                                                                                                                     |
| Keywords:                       | Public health < INFECTIOUS DISEASES, MENTAL HEALTH, HIV & AIDS < INFECTIOUS DISEASES                                                                                                                                                                                                                                                                                                                                                                                                                                                                                                                                                                                                                                                                                                                       |
|                                 |                                                                                                                                                                                                                                                                                                                                                                                                                                                                                                                                                                                                                                                                                                                                                                                                            |

SCHOLARONE™  
Manuscripts



I, the Submitting Author has the right to grant and does grant on behalf of all authors of the Work (as defined in the below author licence), an exclusive licence and/or a non-exclusive licence for contributions from authors who are: i) UK Crown employees; ii) where BMJ has agreed a CC-BY licence shall apply, and/or iii) in accordance with the terms applicable for US Federal Government officers or employees acting as part of their official duties; on a worldwide, perpetual, irrevocable, royalty-free basis to BMJ Publishing Group Ltd ("BMJ") its licensees and where the relevant Journal is co-owned by BMJ to the co-owners of the Journal, to publish the Work in this journal and any other BMJ products and to exploit all rights, as set out in our [licence](#).

The Submitting Author accepts and understands that any supply made under these terms is made by BMJ to the Submitting Author unless you are acting as an employee on behalf of your employer or a postgraduate student of an affiliated institution which is paying any applicable article publishing charge ("APC") for Open Access articles. Where the Submitting Author wishes to make the Work available on an Open Access basis (and intends to pay the relevant APC), the terms of reuse of such Open Access shall be governed by a Creative Commons licence – details of these licences and which [Creative Commons](#) licence will apply to this Work are set out in our licence referred to above.

Other than as permitted in any relevant BMJ Author's Self Archiving Policies, I confirm this Work has not been accepted for publication elsewhere, is not being considered for publication elsewhere and does not duplicate material already published. I confirm all authors consent to publication of this Work and authorise the granting of this licence.

1  
2  
3 **Intersectional stigma and its impact on HIV prevention and care among MSM and WSW**  
4  
5 **in sub-Saharan African countries: a protocol for a scoping review**  
6  
7

8 <sup>1</sup>Gamji M'Rabiu Abubakari, <sup>2,3</sup>Debbie Dada, <sup>3</sup>Jemal D. Nur, <sup>1</sup>DeAnne Turner, <sup>2</sup>Amma Otchere,  
9  
10 <sup>2</sup>Leonne Tanis, <sup>4</sup>Zhao Ni, <sup>5</sup>Ibrahim Wumpini Mashoud, <sup>6</sup>Kate Nyhan, <sup>7</sup>Laura Nyblade, & <sup>1-</sup>  
11  
12 <sup>3,8</sup>LaRon E. Nelson  
13

14  
15 Correspondence to Dr. Gamji M'Rabiu Abubakari: mohammed-rabiu.abubakari@yale.edu  
16

17 **Author Affiliations**  
18

19 <sup>1</sup>Yale AIDS Prevention Training Program (Y-APT), Center for Interdisciplinary Research on  
20  
21 AIDS (CIRA), School of Public Health/Medicine, Yale University, New Haven, CT, USA; <sup>2</sup>Yale  
22  
23 University School of Nursing, New Haven, CT, USA; <sup>3</sup>MAP Center for Urban Health Solutions,  
24  
25 Unity Health Toronto, Toronto, Canada; <sup>4</sup>School of Medicine, Yale University; <sup>5</sup>37 Military  
26  
27 Hospital Accra, Ghana; <sup>6</sup>Harvey Cushing / John Hay Whitney Medical Library, Yale University;  
28  
29 Environmental Health Sciences, Yale School of Public Health, Yale University; <sup>7</sup>Global Health  
30  
31 Division, International Development Group RTI, International, <sup>8</sup>Yale Institute of Global Health,  
32  
33 Yale University, New Haven, CT, USA;  
34  
35  
36  
37  
38  
39  
40  
41  
42  
43  
44  
45  
46  
47  
48  
49  
50  
51  
52  
53  
54  
55  
56  
57  
58  
59  
60

## Abstract

**Introduction:** Research has established that various forms of stigma (HIV stigma, gender non-conforming stigma, and same-gender sex stigma) exist across Sub-Saharan Africa and have consequences for the utilization of HIV prevention and care services. Stigmas are typically investigated in HIV literature individually or through investigating individual populations and the various stigmas they may face. The concept of intersectionality highlights the interconnected nature of social categorizations and their ability to create interdependent systems of discrimination based on gender, race, sexuality, etc. Drawing from perspectives on intersectionality, intersectional stigma denotes the convergence of multiple marginalized identities within an individual or a group, the experiences of stigma associated with these identities, as well as the synergistic impact of these experiences on health and wellbeing. With respect to HIV, public health scholars can examine the impacts of intersectional stigmas on HIV prevention and care utilization.

**Methods and analysis:** Reviewers will search systematically through MEDLINE, Global Health, Embase, Scopus, Web of Science Core Collection, and Africa Index Medicus and citations for quantitative studies, qualitative studies and grey literature that include data on stigma and HIV among MSM and WSW in Sub-Saharan Africa.. Eligible studies will include primary or secondary data on stigma related to HIV-risk factors experienced by this population. be written in French or English and be published between January 1991 and November 2020. All screening and data extraction will be performed in duplicate and if discrepancies arise, they will be settled by GMRA, LEN, DD or AO. Findings from this study will be reported according

1  
2  
3 to the Preferred Reporting Items for Systematic reviews and Meta-Analyses Extension for  
4 Scoping Reviews (PRISMA-ScR).

5  
6  
7  
8 **Ethics and dissemination:** Ethics approval is not required as there will be no human participants  
9 and no protected data will be used in this study. We will disseminate findings through peer-  
10 reviewed manuscripts, conferences and webinars.  
11  
12  
13

#### 14 15 16 17 **Strengths and limitations of the study:**

- 18  
19 ● This scoping review is reinforced by the comprehensive search strategy designed by an  
20 experienced public health librarian, peer reviewed by an independent medical librarian  
21 and supplemented with citation chaining  
22  
23
  - 24 ● The novel approach to this research topic is a strength as it will enable us to highlight the  
25 current status of intersectional stigma as a key determinant of access to HIV prevention  
26 and care among key populations  
27  
28
  - 29 ● A limitation of this review is the focus on Sub-Saharan Africa, as it restricts  
30 generalizability to the experiences of MSM and WSW globally  
31  
32
- 33  
34  
35  
36  
37  
38  
39  
40  
41

### 42 **Introduction**

43  
44 Human immunodeficiency virus (HIV) remains one of the leading causes of death  
45 worldwide, with the majority of global cases concentrated in sub-Saharan Africa (1, 2). Though  
46 sub-Saharan Africa comprises 12% of the world population, this region accounted for 75% of  
47 HIV-related deaths and 65% of new HIV infections globally in 2017 (1, 2). Rates of HIV  
48 infections are particularly high in Eastern and Southern Africa, with nine countries in this region  
49  
50  
51  
52  
53  
54  
55  
56  
57  
58  
59  
60



1  
2  
3 accounting for nearly 50% of the global total of people living with HIV (3). In any global  
4 context, men who have sex with men (MSM) stand at a heightened risk for HIV infection (4, 5).  
5  
6 Within sub-Saharan Africa, HIV prevalence among MSM is three times as high as HIV  
7 prevalence in the general male population (5). Also, despite the disproportionate burden of HIV  
8 among women in sub-Saharan Africa, limited research examines the prevalence of HIV among  
9 women who have sex with women (WSW) in this region (3, 6). There exists a long-standing  
10 assumption that WSW do not face a high-risk of HIV infection, yet some existing research has  
11 drawn contrary conclusions, supporting the need for investigating the risks of HIV infection and  
12 barriers to HIV prevention and care services among WSW in sub-Saharan Africa (6, 7, 8). While  
13 MSM and WSW populations constitute a small percentage of the overall population, they have  
14 an extremely high risk for HIV transmission with estimated prevalence in Sub-Saharan countries  
15 ranging from 12% to as high as 30% (9). MSM and WSW face several barriers to HIV  
16 prevention and treatment, from community-wide issues (e.g. inadequate financial resources, lack  
17 of convenient access to healthcare clinics) to specific barriers that arise as a result of their HIV  
18 status and/or from their identity as MSM or WSW (e.g. stigma) (5, 7, 10).  
19  
20  
21  
22  
23  
24  
25  
26  
27  
28  
29  
30  
31  
32  
33  
34  
35  
36

37 Stigma emanates from a construct of psychological, social, and societal factors that  
38 engender and enforce inequalities between groups of people (11). The social ecological model  
39 emphasizes the multi-layered manner in which people conceive and enact stigma, as well as the  
40 important role power structures play in maintaining it (12). Stigmas are commonly associated  
41 with certain socio-demographic characteristics, behaviours, experiences and health conditions.  
42 Stigma can be manifested and experienced on the individual, interpersonal, institutional and  
43 societal level. Drivers (such as stereotypes and lack of awareness) cause stigma on an individual  
44 level, while facilitators (such as laws, culture and gender norms) cause it at a societal level (13).  
45  
46  
47  
48  
49  
50  
51  
52  
53  
54  
55  
56  
57  
58  
59  
60

1  
2  
3 Intersectional stigma occurs when an individual or group experience(s) multiple stigmas  
4 that are not only overlapping but also co-constitutive. It denotes the synergistic effect produced  
5  
6 by systems of oppression at the intersection of these stigmatized identities, behaviours, and/or  
7  
8 conditions on wellbeing and health (14-16). HIV scholars predominantly examine stigma and  
9  
10 marginalized identities in a piecemeal way by mainly focusing on single factors such as: gender,  
11  
12 sexual orientation, profession, race, socioeconomic status, etc. (17-19). MSM in Sub-Saharan  
13  
14 Africa have been reported to experience intersectional stigma with regards to same-sex  
15  
16 attraction, gender-non-conforming behaviour, actual or perceived HIV status, etc. (20) At health-  
17  
18 care facilities, MSM experience treatment refusal, verbal abuse, and avoidance behaviours (like  
19  
20 double gloving) and on the social level, they experience physical and verbal harassment, social  
21  
22 isolation and discrimination (21-24). For the sake of preserving interpersonal relationships, many  
23  
24 MSM avoid HIV-related care out of fear of others suspecting that they have sex with men and  
25  
26 this anticipated stigma is further compounded by a fear of discriminatory treatment at healthcare  
27  
28 facilities (25, 26). These are just some of the reasons for which fear of stigmatization and  
29  
30 discrimination are key determinants of voluntary HIV testing, care-seeking, and linkage to care  
31  
32 among MSM (27, 28). By viewing stigma through an intersectional lens, researchers are able to  
33  
34 gain a more comprehensive view of the impact of HIV/AIDS on lived experience, to identify  
35  
36 synergies between risk factors that may allow for development of more impactful and efficient  
37  
38 solutions and to develop multi-faceted solutions.  
39  
40  
41  
42  
43  
44  
45

46  
47 Different forms of stigma, while often analyzed individually, do not exist singularly.  
48  
49 While MSM and WSW experience intersectional forms of stigma, the ways in which  
50  
51 intersectional stigma affects health outcomes for these groups remain poorly understood (29). In  
52  
53 Sub-Saharan Africa specifically, there are a limited number of studies on intersectional stigma  
54  
55  
56  
57  
58  
59  
60

1  
2  
3 and its implications for HIV-related health outcomes. The primary objective of this study is to  
4 assess the state of science with regards to HIV-related stigma research on MSM and WSW  
5 populations in Sub-Saharan Africa. It aims to investigate the common presentations of stigma in  
6 HIV research and how often stigma is discussed and conceptualized in research as an  
7 intersectional experience. The secondary objective of this study is to evaluate how the  
8 experience of intersectional stigma is shown to affect HIV prevention and care for MSM and  
9 WSW in literature. Overall, this study intends to provide an overview of intersectional  
10 experiences of stigma among MSM and WSW and its effects on HIV-related health outcomes.  
11  
12  
13  
14  
15  
16  
17  
18  
19  
20  
21

### 22 **Methods and Analysis**

23  
24 To develop the protocol for this scoping review, we used the guideline for scoping  
25 reviews; the Preferred Reporting Items for Systematic Reviews and Meta-Analysis extension for  
26 Scoping Reviews (PRISMA-ScR) (30). As explained by Tricco et al., (2018), before a scoping  
27 review, the research team needs to develop a protocol to explain the intent and processes of the  
28 scoping review (30). Such a protocol, when reviewed and published, will ensure transparency of  
29 the process and avoidance of duplication of efforts.  
30  
31  
32  
33  
34  
35  
36  
37

### 38 **Ethics and dissemination**

39  
40 There will be no human participants and no data collection in this study. As such, ethics  
41 approval is not required (31). The findings from this study will be disseminated through  
42 conferences, webinars, peer-reviewed manuscripts and could inform the policies and practices of  
43 government health agencies and healthcare facilities.  
44  
45  
46  
47  
48

### 49 **Patient and Public Involvement**

50  
51 We will not engage MSM and WSW when conducting this scoping review. We however  
52 anticipate to disseminate findings to the public, with special attention to audiences involved in  
53  
54  
55  
56  
57  
58  
59  
60

1  
2  
3 HIV research and practice in order to inform decision making in health care practice and policy  
4  
5 (32).

### 8 **Criteria for Study Inclusion**

10 For an article to qualify for inclusion in this scoping review it must discuss at least one or  
11 more types of stigma related to HIV-risk factors, prevention, intervention, or care. The study  
12 must also present primary or secondary data involving MSM or WSW and be conducted in one  
13 or more sub-Saharan African countries. The United Nations defines sub-Saharan African  
14 countries to include all countries south of the Sahara, namely; Angola, Benin, Botswana, Burkina  
15 Faso, Burundi, Cameroon, Central African Republic, Chad, Congo, Cote d'Ivoire, Eritrea,  
16 Ethiopia, Gabon, Gambia, Ghana, Guinea, Guinea-Bissau, Kenya, Lesotho, Liberia, Madagascar,  
17 Malawi, Mali, Mauritania, Mauritius, Mozambique, Namibia, Niger, Nigeria, Rwanda, Senegal,  
18 Sierra Leone, Somalia, South Africa, United Republic of Tanzania, Togo, Uganda, Zaire,  
19 Zambia, and Zimbabwe (33). To ensure an extensive inclusion of articles from as many parts of  
20 sub-Saharan Africa as possible, we will include studies written in English and French.  
21  
22  
23  
24  
25  
26  
27  
28  
29  
30  
31  
32  
33  
34

35 As literature that evaluates stigma related to HIV prevention and care among MSM and  
36 WSW in an intersectional manner remains limited, in order to meet our primary objective of  
37 evaluating how stigma is discussed in HIV research, we will also include studies that examine a  
38 single stigma in our analysis. However, these single-stigma studies will not be included in the  
39 full data extraction process (only basic information and the type of stigma studied will be  
40 extracted) and will instead only be used to assess what proportion of the literature evaluates  
41 stigma intersectionally. (34). Keeping articles that discuss single stigmas will enable the team to  
42 quantify and compare studies on intersectional stigma with those on individual stigmas. We will  
43 exclude studies published before 1991 as we identified the first peer-reviewed journal article  
44  
45  
46  
47  
48  
49  
50  
51  
52  
53  
54  
55  
56  
57  
58  
59  
60

1  
2  
3 focused on intersectional HIV stigma was published in this year We will exclude studies that  
4 combine data from sub-Saharan African countries with data from other countries in a way that  
5 the team cannot extract the data on sub-Saharan African countries distinctively.  
6  
7

8  
9  
10 **Types of studies.** Both experimental and observational studies will be considered in this  
11 review. Studies will not be excluded based on methodological approaches; quantitative,  
12 qualitative, and mixed methods studies will be considered. Articles synthesizing existing  
13 literature, such as reviews, will not be included in analysis but will be used for citation chaining.  
14  
15  
16

### 17 **Search Strategy**

18  
19  
20  
21

22 **Identifying sources.** Author KN, a research librarian for the Yale University School of  
23 Public Health, will lead the search for articles; authors GMRA, LEN, and DD will support KN in  
24 identifying sources of grey literature from reports of organizations that examine HIV in sub-  
25 Saharan African countries.  
26  
27  
28  
29  
30  
31

32 **Electronic database searching.** We will search for relevant documents in key public  
33 health sources MEDLINE (Ovid), Global Health (Ovid), and Embase (Ovid), and bibliographic  
34 databases that index content across disciplines: Scopus, Web of Science Core Collection (as  
35 licensed at Yale). We will also search regional literature databases: Africa-Wide Information and  
36 Africa Index Medicus (through Global Index Medicus). See example (supplementary file)  
37  
38  
39  
40  
41  
42  
43  
44

45 **Grey literature searching.** To identify other pertinent documents not found in the  
46 electronic search of bibliographic databases, we will search for theses, dissertations, and  
47 conference papers in the databases ProQuest Dissertations and Theses Global, Open Access  
48 Theses and Dissertations, and Networked Digital Library of Theses and Dissertations. We will  
49 also search on organizational websites, such as the United Nations Program on HIV/AIDS –  
50  
51  
52  
53  
54  
55  
56  
57  
58  
59  
60

1  
2  
3 UNAIDS, the Global Fund, International AIDS Society, and the World Health Organization –  
4  
5 WHO. Additionally, we will identify and contact key scholars who examine HIV in sub-Saharan  
6  
7 African countries on possible reports and sources of articles that examine stigma, and  
8  
9 unidentified by the team through other search strategies. Finally, we will supplement our  
10  
11 searches of traditional bibliographic databases by searching Google Scholar and screening results  
12  
13 until the Google Scholar relevance ranking order shows us 20 results that are not relevant.  
14  
15  
16

### 17 18 **Data Screening**

19  
20 Studies will be imported into EndNote and duplicates will be removed. The remaining  
21  
22 citations and abstracts, as well as inclusion and exclusion criteria, will be added to Covidence  
23  
24 Systematic Review Software (35). Using Covidence Systematic Review Software, four reviewers  
25  
26 will screen the title and abstract of the first 50 articles in pairs, as recommended in the PRISMA-  
27  
28 ScR guideline, to ensure clarity of the inclusion and exclusion criteria (30). Inter-rater reliability  
29  
30 (IRR) will be estimated using Cohen's kappa. Acceptable agreement will be considered at  $k=0.80$   
31  
32 (36). If we cannot determine study eligibility from the title and abstract alone, the full text will  
33  
34 be screened to determine eligibility. After IRR is determined, each of the remaining articles will  
35  
36 be reviewed by two independent reviewers. Disagreements will be resolved by GMRA, DD or  
37  
38 AO.  
39  
40  
41  
42

### 43 **Data Extraction**

44  
45 **Content.** After screening articles for eligibility, we aim to extract the data on publication  
46  
47 information, conceptualization components, methodology, and results. On **publication**  
48  
49 **information**, we will extract author names, year of publication, the journal of publication, and  
50  
51 funding source, when applicable. On **conceptualization components**, we will extract information  
52  
53 on the research questions or hypothesis, theoretical or conceptual frameworks used and variables  
54  
55  
56  
57  
58  
59  
60

(e.g. types of stigma measured, condom use, sex episodes). Concerning the *methodology*, we will extract information on the study design (e.g. qualitative design, mixed-method design, quantitative design), sampling and recruitment techniques (e.g. simple random sampling, snowball sampling), and methods of data collection (e.g. interviews, surveys, focus group discussion). We will also extract information on the analytical techniques (e.g. correlation, qualitative coding). Additionally, we will extract data on the *setting of the study* (e.g. country, cardinal point location, rural/urban areas, if identified). For the *results*, we will first extract the participant information (MSM, WSW, number of participants, socio-economic characteristics, such as age range, income, education). We will then extract findings of the study on intersectional stigma and its impact on HIV prevention and care in the population. For each finding, we will extract information, such as main thematic areas, quotes, measures of central tendency, and statistical findings, when applicable. We will not extract data from single stigma article beyond identifying the type of stigma examined (e.g. gender, HIV)

**Process.** To enable a systematic and coordinated approach to data extraction, we will use a data extraction Google Form with questions for each extractor to enter the findings from the study. The tool has specific questions that extractors need to answer. At least two authors will extract data from each article to ensure consistency. The two authors will meet to discuss and evaluate the extracted data for missing information or contradicting reports. Authors GMRA and LEN will meet with extractors to reach consensus on contradictory information if the primary reviewers could not arrive at a decision.

### **Analyses and reporting**

We will report the findings from the extracted data based on PRISMA-ScR guidelines (30). We will use a table to report the results based on the questions. We will then provide a

narrative synthesis of the findings based on the common themes that answer the specific research questions.

### **Outcome**

The primary outcome of this study is investigating the nature of intersectional stigma associated with HIV risk factors experienced by MSM and WSW living in Sub-Saharan Africa as well as evaluating the scope of and gaps in existing literature on stigma associated with these populations. The secondary outcome of this study is investigating the impacts of intersectional stigma on access to HIV prevention and care services among our target population.

## **DISCUSSION**

Sexual minorities in Sub-Saharan African countries, including MSM and WSW, experience various forms of stigma that have effects on their health and wellbeing (37). The intersectional stigma faced by these groups can greatly impact their access to HIV prevention and care services (38, 39). Studying the effect of intersectional stigma in this region is of particular importance because HIV transmission and HIV-related mortality is elevated (40). Many interventions have been initiated in this region to expand access to HIV treatment and prevention services (41), but a limited number of studies have investigated the role of that intersectional stigma might play in limiting access to these interventions. While there are many studies from a variety of disciplines that have established social determinants of health such as social-economic status, race, and sex can privilege or disadvantage people at the individual and societal level (33), there has been limited investigation on the manner in which intersectional stigma might privilege or disadvantage people and have effects on the HIV burden in this region.



1  
2  
3 Specifically, more research is needed to understand and to reduce the intersectional stigma  
4 creating barriers to accessing HIV services.  
5  
6

7 This scoping review will contribute important knowledge to HIV prevention, but it is not without  
8 limitations. Its specificity to the Sub-Saharan African region may reduce its generalizability to  
9 other parts of the world. Nevertheless, given intersectional stigma exists across geopolitical  
10 contexts and this scoping review includes an extensive search on current literature, we believe  
11 that the knowledge it generates could be applied globally.  
12  
13  
14  
15  
16  
17  
18

### 19 **Ethical Consideration**

20  
21 Considering that we will not engage patients or the public in the scoping review, we do  
22 not need to seek ethical approval from our Institutional Review Board.  
23  
24  
25

### 26 **Dissemination Plan**

27  
28 We will publish the scoping review findings in a peer-reviewed journal to ensure that  
29 other scholars, practitioners, and the general public can access it for use. We will also present the  
30 findings at HIV and stigma conferences and other spaces when the opportunity arises.  
31  
32 Additionally, we will use the findings to conceptualize new studies to fill in the scholarly gaps  
33 identified.  
34  
35  
36  
37  
38  
39  
40

### 41 **Funding statement:**

42  
43 This study was made possible with funding from the National Institutes of Health,  
44 National Institute of Nursing Research, Multi-Level Intervention Addressing Intersectional  
45 Stigma to Improve HIV Testing in MSM (R01 NR019009). We thank the Behavioural Insights  
46 Team at the Yale Institute of Global Health for their support in the preparation of our data  
47 extraction form.  
48  
49  
50  
51  
52  
53  
54  
55  
56  
57  
58  
59  
60

### **Acknowledgements:**

This publication was also made possible through core services and support from the Yale University Center for Interdisciplinary Research on AIDS (P30 MH062294) and the Yale AIDS Prevention Training Program (T32MH020031).

### **Author Contribution Statement**

GMRA is the first and corresponding author; GMRA, LEN and LN conceived the study; GMRA, DD, JDN, DT, LT, KN and LEN conducted initial review, finalized the focus of the study and designed the study; KN, GMRA and DD established the search strategy. All authors (GMRA, DD, JDN, DT, AO, LT, ZN, IWM, KN, LN and LEN) contributed to drafting the manuscript; GMRA and DD performed critical revisions of the manuscript. All authors approved the final version of the manuscript.

### **Author Competing Interest Statement**

The authors declare that they have no known competing financial interests or personal relationships that could have appeared to influence the work reported in this paper.

## References

1. James SL, Abate D, Abate KH, *et al.* Global, regional, and national incidence, prevalence, and years lived with disability for 354 diseases and injuries for 195 countries and territories, 1990–2017: a systematic analysis for the Global Burden of Disease Study 2017. *The Lancet*. 2018;392(10159):1789-858.
2. Roth GA, Abate D, Abate KH, *et al.* Global, regional, and national age-sex-specific mortality for 282 causes of death in 195 countries and territories, 1980–2017: a systematic analysis for the Global Burden of Disease Study 2017. *The Lancet*. 2018;392(10159):1736-88.
3. UN Joint Program on AIDS (UNAIDS). *The Gap Report*. Geneva: United Nations; 2014.
4. Baral S, Sifakis F, Cleghorn F, *et al.* Elevated Risk for HIV Infection among Men Who Have Sex with Men in Low- and Middle-Income Countries 2000–2006: A Systematic Review. *PLOS Medicine*. 2007;4(12):e339.
5. Beyrer C, Baral SD, van Griensven F, *et al.* Global epidemiology of HIV infection in men who have sex with men. *The Lancet* 2012;380(9839):367-77.
6. Tat SA, Marrazzo JM, Graham SM. Women Who Have Sex with Women Living in Low- and Middle-Income Countries: A Systematic Review of Sexual Health and Risk Behaviors. *LGBT Health*. 2015;2(2):91-104.
7. Poteat TC, Logie CH, Adams D, *et al.* Stigma, sexual health, and human rights among women who have sex with women in Lesotho. *Reprod Health Matters*. 2015;23(46):107-16.

- 1  
2  
3 8. Marrazzo, J. M. (2000). Sexually transmitted infections in women who have sex with  
4 women: who cares? *Sexually Transmitted Infections*, 76(5), 330–332.  
5  
6 doi:10.1136/sti.76.5.330  
7  
8
- 9  
10 9. Samuel, K. MSM living in African countries that criminalise gay sex are at a much  
11 higher risk of getting HIV. NAM AIDSMAP. 2020;[https://www.aidsmap.com/news/jul-](https://www.aidsmap.com/news/jul-2020/msm-living-african-countries-criminalise-gay-sex-are-much-higher-risk-getting-hiv)  
12  
13 2020/msm-living-african-countries-criminalise-gay-sex-are-much-higher-risk-getting-  
14  
15 hiv.  
16  
17
- 18  
19  
20 10. Croome N, Ahluwalia M, Hughes LD, *et al*. Patient-reported barriers and facilitators to  
21 antiretroviral adherence in sub-Saharan Africa. *AIDS*. 2017;31(7):995-1007.  
22  
23
- 24  
25 11. "Tackling HIV Stigma: What Works? Using the Global Evidence Base to Reduce the  
26 Impact of HIV Stigma." National AIDS Trust. FCB Health Network, June 2016. Web.  
27  
28
- 29  
30 12. Baral S, Logie CH, Grosso A, Wirtz AL, Beyrer C. Modified Social Ecological Model: A  
31 Tool to Guide the Assessment of the Risks and Risk Contexts of HIV Epidemics. *BMC*  
32  
33 *Public Health*. 2013;13(1): 482. doi: 10.1186/1471-2458-13-482  
34  
35
- 36  
37 13. Stangl A, Brady L, Fritz K. STRIVE Technical Brief: Measuring HIV stigma and  
38 discrimination; International Center for Research on Women, Washington D.C., USA;  
39  
40 2012 (updated in 2018).  
41  
42
- 43  
44 14. Turan, J.M., Elafros, M.A., Logie, C.H. et al. Challenges and opportunities in examining  
45 and addressing intersectional stigma and health. *BMC Med* 17, 7 (2019).  
46  
47 <https://doi.org/10.1186/s12916-018-1246-9>  
48  
49
- 50  
51 15. Bowleg L. The problem with the phrase women and minorities: intersectionality-an  
52 important theoretical framework for public health. *Am J Public Health*.  
53  
54 2012;102(7):1267–73.  
55  
56  
57  
58  
59

- 1  
2  
3 16. Sangaramoorthy T, Jamison AM, Dyer TV. HIV stigma, retention in care, and adherence  
4 among older black women living with HIV. *J Assoc Nurses AIDS Care*. 2017;28(4):518–  
5 31.  
6  
7  
8  
9  
10 17. Jackson-Best F, Edwards N. Stigma and intersectionality: a systematic review of  
11 systematic reviews across HIV/AIDS, mental illness, and physical disability. *BMC*  
12 *Public Health*. 2018;18(1). doi:10.1186/s12889-018-5861-3  
13  
14  
15  
16  
17 18. Mburu G, Ram M, Siu G, Bitira D, Skovdal M, Holland P. Intersectionality of HIV  
18 stigma and masculinity in eastern Uganda: implications for involving men in HIV  
19 programmes. *BMC Public Health*. 2014;14(1). doi:10.1186/1471-2458-14-1061  
20  
21  
22  
23  
24 19. Hargreaves JR, Busza J, Mushati P, Fearon E, Cowan, FM. Overlapping HIV and sex-  
25 work stigma among female sex workers recruited to 14 respondent-driven sampling  
26 surveys across Zimbabwe, 2013. *AIDS Care*. 2016;29(6):675–685.  
27  
28  
29  
30  
31  
32  
33 20. Gu LY, Zhang N, Mayer KH, McMahon JM, Nam S, Conserve DF, Moskow M, Brasch  
34 J, Adu-Sarkodie Y, Agyarko-Poku T, Boakye F, Nelson LE. Autonomy-Supportive  
35 Healthcare Climate and HIV-Related Stigma Predict Linkage to HIV Care in Men Who  
36 Have Sex With Men in Ghana, West Africa. *J Int Assoc Provid AIDS Care*. 2021 Jan-  
37 Dec;20:2325958220978113. doi: 10.1177/2325958220978113. PMID: 33733909.  
38  
39  
40  
41  
42  
43  
44 21. Kushwaha S, Lalani Y, Maina G, *et al*. “But the moment they find out that you are  
45 MSM...”: a qualitative investigation of HIV prevention experiences among men who  
46 have sex with men (MSM) in Ghana’s health care system. *BMC Public Health*.  
47  
48  
49  
50  
51  
52  
53  
54  
55  
56  
57  
58  
59  
60

- 1  
2  
3  
4  
5  
6  
7  
8  
9  
10  
11  
12  
13  
14  
15  
16  
17  
18  
19  
20  
21  
22  
23  
24  
25  
26  
27  
28  
29  
30  
31  
32  
33  
34  
35  
36  
37  
38  
39  
40  
41  
42  
43  
44  
45  
46  
47  
48  
49  
50  
51  
52  
53  
54  
55  
56  
57  
58  
59  
60
22. Kennedy CE, Baral SD, Fielding-Miller R, *et al.* “They are human beings, they are Swazi”: intersecting stigmas and the positive health, dignity and prevention needs of HIV-positive men who have sex with men in Swaziland. *Journal of the International AIDS Society.* 2013;16(4 Suppl 3):18749. doi:10.7448/ias.16.4.18749
  23. Cloete A, Simbayi LC, Kalichman SC, Strebel A, Henda N. Stigma and discrimination experiences of HIV-positive men who have sex with men in Cape Town, South Africa. *AIDS Care.* 2008;20(9):1105–1110. doi:10.1080/09540120701842720
  24. Anderson AM, Ross MW, Nyoni JE, McCurdy SA. High prevalence of stigma-related abuse among a sample of men who have sex with men in Tanzania: implications for HIV prevention. *AIDS Care.* 2014;27(1):63–70. doi:10.1080/09540121.2014.951597
  25. Kim HY, Grosso A, Ky-Zerbo O, *et al.* Stigma as a barrier to health care utilization among female sex workers and men who have sex with men in Burkina Faso. *Ann Epidemiol.* 2018;28(1):13-9.
  26. Bwambale FM, Ssali SN, Byaruhanga S, Kalyango JN, Karamagi CA. Voluntary HIV Counselling and Testing among Men in Rural Western Uganda: Implications for HIV Prevention. *BMC Public Health.* 2008; 8(1):263-276.
  27. Nelson LE, McMahon J, Zhang N, Adu-Sarkodie Y, Mayer KH. Exploring HIV, same-sex and gender non-conformity stigmas and delays in HIV diagnosis, linkage and retention for MSM in Ghana. National Institute of Mental Health; 2016.
  28. Holtzman S, Landis L, Walsh Z, Puterman E, Roberts D, Saya-Moore K. Predictors of HIV testing among men who have sex with men: a focus on men living outside major urban centres in Canada. *AIDS care.* 2016;28(6):705-11.

- 1  
2  
3  
4  
5  
6  
7  
8  
9  
10  
11  
12  
13  
14  
15  
16  
17  
18  
19  
20  
21  
22  
23  
24  
25  
26  
27  
28  
29  
30  
31  
32  
33  
34  
35  
36  
37  
38  
39  
40  
41  
42  
43  
44  
45  
46  
47  
48  
49  
50  
51  
52  
53  
54  
55  
56  
57  
58  
59  
60
29. Turan JM, Elafros MA, Logie CH, *et al.* Challenges and opportunities in examining and addressing intersectional stigma and health. *BMC medicine*. 2019;17(1):7-7. <https://doi.org/10.1186/s12916-018-1246-9>
30. Tricco AC, Lillie E, Zari W, *et al.* PRISMA extension for scoping reviews (PRISMA-ScR): checklist and explanation. *Ann Intern Med*. 2018;169(7):467-473. doi:10.7326/M18-0850.
31. Yale University Institutional Review Boards. IRB Policy 100 Institutional Review Board (IRB) Review of Human Subject Research Protocols or FDA- Regulated Activities Involving Human Participants. New Haven: USA; 2018.
32. Mburu G, Igbinedion E, Lim SH, *et al* Outcomes of HIV treatment from the private sector in low-income and middle-income countries: a systematic review protocol *BMJ Open*. 2020;10:e031844. doi: 10.1136/bmjopen-2019-031844
33. UNICEF. The State of the World's Children 1996 Report. New York: USA; 1996. Available at <https://www.unicef.org/sowc96/groups.htm>.
34. Grossman AH. Gay men and HIV/AIDS: understanding the double stigma. *J Assoc Nurses AIDS Care*. 1991;2(4):28-32.
35. Covidence systematic review software, Veritas Health Innovation, Melbourne, Australia. Available at [www.covidence.org](http://www.covidence.org). 2019.
36. Belur J, Tompson L, Thornton A, Simon M. Interrater Reliability in Systematic Review Methodology: Exploring Variation in Coder Decision-Making. *Sociological Methods & Research*. September 2018. doi:10.1177/0049124118799372

- 1  
2  
3 37. Risher K, Adams D, Sithole B, *et al.* Sexual stigma and discrimination as barriers to  
4 seeking appropriate healthcare among men who have sex with men in Swaziland. *Journal*  
5 *of the International AIDS Society.* 2013;16(3 Suppl 2):18715-18715.  
6  
7  
8  
9  
10 38. Turan JM, Elafros MA, Logie CH, *et al.* Challenges and opportunities in examining and  
11 addressing intersectional stigma and health. *BMC medicine.* 2019;17(1):7-7.  
12  
13  
14 39. Eichenberger A, Weisser M, Battegay M. [HIV in Sub-Saharan Africa: Where Are We  
15 Today?]. *Praxis (Bern 1994).* Nov 2019;108(15):971-976.  
16  
17  
18  
19 40. Kharsany ABM, Karim QA. HIV Infection and AIDS in Sub-Saharan Africa: Current  
20 Status, Challenges and Opportunities. *The open AIDS journal.* 2016;10:34-48.  
21  
22  
23  
24 41. Ortblad KF, Baeten JM, Cherutich P, Wamwicwe JN, Wasserheit JN. The arc of HIV  
25 epidemics in sub-Saharan Africa: new challenges with concentrating epidemics in the era  
26 of 90-90-90. *Current opinion in HIV and AIDS.* 2019;14(5):354-365.  
27  
28  
29  
30  
31  
32  
33  
34  
35  
36  
37  
38  
39  
40  
41  
42  
43  
44  
45  
46  
47  
48  
49  
50  
51  
52  
53  
54  
55  
56  
57  
58  
59  
60



## Ovid MEDLINE(R) ALL &lt;1946 to November 23, 2020&gt;

Search history sorted by search number ascending

| #  | Searches                                                                             | Results |
|----|--------------------------------------------------------------------------------------|---------|
| 1  | [Gamji MEDLINE draft 20201124]                                                       | 0       |
| 2  | [queries from Kate's project with Sarah Abboud project, edited to focus on MSM, WSW] | 0       |
| 3  | bicurious.mp.                                                                        | 3       |
| 4  | bisexual*.mp.                                                                        | 10791   |
| 5  | gay.mp.                                                                              | 11636   |
| 6  | gays.mp.                                                                             | 460     |
| 7  | gender minorit*.mp.                                                                  | 4618    |
| 8  | gender queer.mp.                                                                     | 17      |
| 9  | GLB.mp.                                                                              | 409     |
| 10 | GLBQ.mp.                                                                             | 3       |
| 11 | GLBs.mp.                                                                             | 16      |
| 12 | GLBT.mp.                                                                             | 101     |
| 13 | GLBTQ.mp.                                                                            | 14      |
| 14 | heteroflexible.mp.                                                                   | 3       |
| 15 | homosexual*.mp.                                                                      | 35679   |
| 16 | lesbian*.mp.                                                                         | 7061    |
| 17 | lesbigay*.mp.                                                                        | 5       |
| 18 | LGB.mp.                                                                              | 1038    |
| 19 | LGBQ.mp.                                                                             | 112     |
| 20 | LGBS.mp.                                                                             | 68      |
| 21 | LGBT*.mp.                                                                            | 2652    |
| 22 | men who have sex with men.mp.                                                        | 11941   |
| 23 | mostly-heterosexual.mp.                                                              | 124     |
| 24 | MSM.mp.                                                                              | 10713   |
| 25 | MSMW.mp.                                                                             | 121     |
| 26 | nonheterosexual*.mp.                                                                 | 151     |
| 27 | non-heterosexual*.mp.                                                                | 279     |
| 28 | queer.mp.                                                                            | 1400    |
| 29 | queers.mp.                                                                           | 26      |
| 30 | same gender loving.mp.                                                               | 7       |
| 31 | same sex couple*.mp.                                                                 | 359     |
| 32 | same sex relations*.mp.                                                              | 324     |
| 33 | same-sex attract*.mp.                                                                | 297     |
| 34 | sexual identit*.mp.                                                                  | 1865    |
| 35 | sexual minorit*.mp.                                                                  | 2860    |
| 36 | sexual orientation*.mp.                                                              | 6157    |
| 37 | sexual preference*.mp.                                                               | 639     |
| 38 | SGM.mp.                                                                              | 603     |
| 39 | women loving women.mp.                                                               | 8       |
| 40 | women who have sex with women.mp.                                                    | 179     |
| 41 | WSW.mp.                                                                              | 153     |

|    |    |                                                                                                                                                                                                                                                                                                                                                                                                                                                                                                                                                                                                                                                                                                                                                                                                                                                                                                                                                                                                                                                                                                                                                                                                                                                                                                                                                                                                                                                                                                                           |         |
|----|----|---------------------------------------------------------------------------------------------------------------------------------------------------------------------------------------------------------------------------------------------------------------------------------------------------------------------------------------------------------------------------------------------------------------------------------------------------------------------------------------------------------------------------------------------------------------------------------------------------------------------------------------------------------------------------------------------------------------------------------------------------------------------------------------------------------------------------------------------------------------------------------------------------------------------------------------------------------------------------------------------------------------------------------------------------------------------------------------------------------------------------------------------------------------------------------------------------------------------------------------------------------------------------------------------------------------------------------------------------------------------------------------------------------------------------------------------------------------------------------------------------------------------------|---------|
| 1  |    |                                                                                                                                                                                                                                                                                                                                                                                                                                                                                                                                                                                                                                                                                                                                                                                                                                                                                                                                                                                                                                                                                                                                                                                                                                                                                                                                                                                                                                                                                                                           |         |
| 2  | 42 | WSWM.mp.                                                                                                                                                                                                                                                                                                                                                                                                                                                                                                                                                                                                                                                                                                                                                                                                                                                                                                                                                                                                                                                                                                                                                                                                                                                                                                                                                                                                                                                                                                                  | 18      |
| 3  | 43 | "sexual and gender minorities"/                                                                                                                                                                                                                                                                                                                                                                                                                                                                                                                                                                                                                                                                                                                                                                                                                                                                                                                                                                                                                                                                                                                                                                                                                                                                                                                                                                                                                                                                                           | 4045    |
| 4  | 44 | bisexuality/                                                                                                                                                                                                                                                                                                                                                                                                                                                                                                                                                                                                                                                                                                                                                                                                                                                                                                                                                                                                                                                                                                                                                                                                                                                                                                                                                                                                                                                                                                              | 4227    |
| 5  | 45 | exp homosexuality/                                                                                                                                                                                                                                                                                                                                                                                                                                                                                                                                                                                                                                                                                                                                                                                                                                                                                                                                                                                                                                                                                                                                                                                                                                                                                                                                                                                                                                                                                                        | 30137   |
| 6  | 46 | or/2-45 [population terms]                                                                                                                                                                                                                                                                                                                                                                                                                                                                                                                                                                                                                                                                                                                                                                                                                                                                                                                                                                                                                                                                                                                                                                                                                                                                                                                                                                                                                                                                                                | 54126   |
| 7  | 47 | stigma*.mp.                                                                                                                                                                                                                                                                                                                                                                                                                                                                                                                                                                                                                                                                                                                                                                                                                                                                                                                                                                                                                                                                                                                                                                                                                                                                                                                                                                                                                                                                                                               | 40591   |
| 8  | 48 | social stigma/                                                                                                                                                                                                                                                                                                                                                                                                                                                                                                                                                                                                                                                                                                                                                                                                                                                                                                                                                                                                                                                                                                                                                                                                                                                                                                                                                                                                                                                                                                            | 8811    |
| 9  | 49 | exp shame/                                                                                                                                                                                                                                                                                                                                                                                                                                                                                                                                                                                                                                                                                                                                                                                                                                                                                                                                                                                                                                                                                                                                                                                                                                                                                                                                                                                                                                                                                                                | 2458    |
| 10 | 50 | [terms from<br><a href="https://www.cochranelibrary.com/cdsr/doi/10.1002/14651858.CD009453.pub2/appendices#CD009453-sec1-0012">https://www.cochranelibrary.com/cdsr/doi/10.1002/14651858.CD009453.pub2/appendices#CD009453-sec1-0012</a> , Clement 2013, with my edits]                                                                                                                                                                                                                                                                                                                                                                                                                                                                                                                                                                                                                                                                                                                                                                                                                                                                                                                                                                                                                                                                                                                                                                                                                                                   | 0       |
| 11 | 51 | stereotyping/                                                                                                                                                                                                                                                                                                                                                                                                                                                                                                                                                                                                                                                                                                                                                                                                                                                                                                                                                                                                                                                                                                                                                                                                                                                                                                                                                                                                                                                                                                             | 11095   |
| 12 | 52 | (stereotyp* or stigma* or label* or negative image* or ignoran* or misconception* or<br>misperception* or ((public* or community or social or popular) adj perception*)).mp.                                                                                                                                                                                                                                                                                                                                                                                                                                                                                                                                                                                                                                                                                                                                                                                                                                                                                                                                                                                                                                                                                                                                                                                                                                                                                                                                              | 753541  |
| 13 | 53 | social perception/                                                                                                                                                                                                                                                                                                                                                                                                                                                                                                                                                                                                                                                                                                                                                                                                                                                                                                                                                                                                                                                                                                                                                                                                                                                                                                                                                                                                                                                                                                        | 23528   |
| 14 | 54 | public opinion/                                                                                                                                                                                                                                                                                                                                                                                                                                                                                                                                                                                                                                                                                                                                                                                                                                                                                                                                                                                                                                                                                                                                                                                                                                                                                                                                                                                                                                                                                                           | 18779   |
| 15 | 55 | prejudice/ or homophobia/                                                                                                                                                                                                                                                                                                                                                                                                                                                                                                                                                                                                                                                                                                                                                                                                                                                                                                                                                                                                                                                                                                                                                                                                                                                                                                                                                                                                                                                                                                 | 25301   |
| 16 | 56 | ((public* or community or social or popular or religious) adj attitude*).mp.                                                                                                                                                                                                                                                                                                                                                                                                                                                                                                                                                                                                                                                                                                                                                                                                                                                                                                                                                                                                                                                                                                                                                                                                                                                                                                                                                                                                                                              | 3305    |
| 17 | 57 | ((negative or positive or chang*) adj3 attitude*) or prejudice* or hostile* or intoleran*).mp.                                                                                                                                                                                                                                                                                                                                                                                                                                                                                                                                                                                                                                                                                                                                                                                                                                                                                                                                                                                                                                                                                                                                                                                                                                                                                                                                                                                                                            | 120023  |
| 18 | 58 | social distance/                                                                                                                                                                                                                                                                                                                                                                                                                                                                                                                                                                                                                                                                                                                                                                                                                                                                                                                                                                                                                                                                                                                                                                                                                                                                                                                                                                                                                                                                                                          | 3087    |
| 19 | 59 | (social adj1 (distance or acceptance or rejection)).mp.                                                                                                                                                                                                                                                                                                                                                                                                                                                                                                                                                                                                                                                                                                                                                                                                                                                                                                                                                                                                                                                                                                                                                                                                                                                                                                                                                                                                                                                                   | 5379    |
| 20 | 60 | rejection, psychology/                                                                                                                                                                                                                                                                                                                                                                                                                                                                                                                                                                                                                                                                                                                                                                                                                                                                                                                                                                                                                                                                                                                                                                                                                                                                                                                                                                                                                                                                                                    | 1605    |
| 21 | 61 | (discriminat* or marginali* or rejecting behavi* or injustice* or (social adj (distance or justice<br>or rejection or acceptance or exclusion or inclusion))).mp.                                                                                                                                                                                                                                                                                                                                                                                                                                                                                                                                                                                                                                                                                                                                                                                                                                                                                                                                                                                                                                                                                                                                                                                                                                                                                                                                                         | 296664  |
| 22 | 62 | [additions based on <a href="https://bmcpublikealth.biomedcentral.com/articles/10.1186/s12889-018-5861-3">https://bmcpublikealth.biomedcentral.com/articles/10.1186/s12889-018-5861-3</a> , Jackson-Best 2018]                                                                                                                                                                                                                                                                                                                                                                                                                                                                                                                                                                                                                                                                                                                                                                                                                                                                                                                                                                                                                                                                                                                                                                                                                                                                                                            | 0       |
| 23 | 63 | social discrimination/                                                                                                                                                                                                                                                                                                                                                                                                                                                                                                                                                                                                                                                                                                                                                                                                                                                                                                                                                                                                                                                                                                                                                                                                                                                                                                                                                                                                                                                                                                    | 1281    |
| 24 | 64 | or/47-63 [stigma terms]                                                                                                                                                                                                                                                                                                                                                                                                                                                                                                                                                                                                                                                                                                                                                                                                                                                                                                                                                                                                                                                                                                                                                                                                                                                                                                                                                                                                                                                                                                   | 1154251 |
| 25 | 65 | [the Sub-Saharan Africa hedge from the Canadian Health Libraries Association<br><a href="https://extranet.santecom.qc.ca/wiki/!biblio3s/doku.php?id=concepts:afrique-subsaheienne">https://extranet.santecom.qc.ca/wiki/!biblio3s/doku.php?id=concepts:afrique-subsaheienne</a> ]                                                                                                                                                                                                                                                                                                                                                                                                                                                                                                                                                                                                                                                                                                                                                                                                                                                                                                                                                                                                                                                                                                                                                                                                                                         | 0       |
| 26 | 66 | Africa South of the Sahara/ or Angola/ or Benin/ or Botswana/ or Burkina Faso/ or Burundi/<br>or Cameroon/ or Cape Verde/ or Central African Republic/ or Chad/ or Comoros/ or Congo/<br>or Brazzaville/ or Cote d'Ivoire/ or Djibouti/ or Equatorial Guinea/ or Eritrea/ or Ethiopia/ or<br>Gabon/ or Gambia/ or Ghana/ or Guinea/ or Bissau/ or Kenya/ or Lesotho/ or Liberia/ or<br>Madagascar/ or Malawi/ or Mali/ or Mauritania/ or Mauritius/ or Mozambique/ or Namibia/ or<br>Niger/ or Nigeria/ or Rwanda/ or Sao Tome e Principe/ or Senegal/ or Seychelles/ or Sierra<br>Leone/ or Somalia/ or South Africa/ or South Sudan/ or Sudan/ or Swaziland/ or Tanzania/<br>or Togo/ or Uganda/ or Western Sahara/ or Zaire/ or Zambia/ or Zimbabwe/ or (Angola or<br>Benin or Botswana or Bobo-Dioulasso or Burkina Faso or Burundi or Cameroon or Cape<br>Verde or Central African Republic or Chad or Comoros or Congo or Brazzaville or Cote<br>d'Ivoire or Djibouti or Equatorial Guinea or Eritrea or Ethiopia or Gabon or Gambia or<br>Ghana or Guinea or Bissau or Kenya or Lesotho or Liberia or Madagascar or Malawi or<br>Mali or Mauritania or Mauritius or Mozambique or Namibia or Niger or Nigeria or Rwanda<br>or Sao Tome e Principe or Senegal or Seychelles or Sierra Leone or Somalia or South<br>Africa or South Sudan or Sudan or Swaziland or Tanzania or Togo or Uganda or Western<br>Sahara or Zaire or Zambia or Zimbabwe or "Africa South of the Sahara" or "Sub-Saharan<br>Africa").tw,kw. | 397719  |
| 27 | 67 | [adjustments]                                                                                                                                                                                                                                                                                                                                                                                                                                                                                                                                                                                                                                                                                                                                                                                                                                                                                                                                                                                                                                                                                                                                                                                                                                                                                                                                                                                                                                                                                                             | 0       |
| 28 |    |                                                                                                                                                                                                                                                                                                                                                                                                                                                                                                                                                                                                                                                                                                                                                                                                                                                                                                                                                                                                                                                                                                                                                                                                                                                                                                                                                                                                                                                                                                                           |         |
| 29 |    |                                                                                                                                                                                                                                                                                                                                                                                                                                                                                                                                                                                                                                                                                                                                                                                                                                                                                                                                                                                                                                                                                                                                                                                                                                                                                                                                                                                                                                                                                                                           |         |
| 30 |    |                                                                                                                                                                                                                                                                                                                                                                                                                                                                                                                                                                                                                                                                                                                                                                                                                                                                                                                                                                                                                                                                                                                                                                                                                                                                                                                                                                                                                                                                                                                           |         |
| 31 |    |                                                                                                                                                                                                                                                                                                                                                                                                                                                                                                                                                                                                                                                                                                                                                                                                                                                                                                                                                                                                                                                                                                                                                                                                                                                                                                                                                                                                                                                                                                                           |         |
| 32 |    |                                                                                                                                                                                                                                                                                                                                                                                                                                                                                                                                                                                                                                                                                                                                                                                                                                                                                                                                                                                                                                                                                                                                                                                                                                                                                                                                                                                                                                                                                                                           |         |
| 33 |    |                                                                                                                                                                                                                                                                                                                                                                                                                                                                                                                                                                                                                                                                                                                                                                                                                                                                                                                                                                                                                                                                                                                                                                                                                                                                                                                                                                                                                                                                                                                           |         |
| 34 |    |                                                                                                                                                                                                                                                                                                                                                                                                                                                                                                                                                                                                                                                                                                                                                                                                                                                                                                                                                                                                                                                                                                                                                                                                                                                                                                                                                                                                                                                                                                                           |         |
| 35 |    |                                                                                                                                                                                                                                                                                                                                                                                                                                                                                                                                                                                                                                                                                                                                                                                                                                                                                                                                                                                                                                                                                                                                                                                                                                                                                                                                                                                                                                                                                                                           |         |
| 36 |    |                                                                                                                                                                                                                                                                                                                                                                                                                                                                                                                                                                                                                                                                                                                                                                                                                                                                                                                                                                                                                                                                                                                                                                                                                                                                                                                                                                                                                                                                                                                           |         |
| 37 |    |                                                                                                                                                                                                                                                                                                                                                                                                                                                                                                                                                                                                                                                                                                                                                                                                                                                                                                                                                                                                                                                                                                                                                                                                                                                                                                                                                                                                                                                                                                                           |         |
| 38 |    |                                                                                                                                                                                                                                                                                                                                                                                                                                                                                                                                                                                                                                                                                                                                                                                                                                                                                                                                                                                                                                                                                                                                                                                                                                                                                                                                                                                                                                                                                                                           |         |
| 39 |    |                                                                                                                                                                                                                                                                                                                                                                                                                                                                                                                                                                                                                                                                                                                                                                                                                                                                                                                                                                                                                                                                                                                                                                                                                                                                                                                                                                                                                                                                                                                           |         |
| 40 |    |                                                                                                                                                                                                                                                                                                                                                                                                                                                                                                                                                                                                                                                                                                                                                                                                                                                                                                                                                                                                                                                                                                                                                                                                                                                                                                                                                                                                                                                                                                                           |         |
| 41 |    |                                                                                                                                                                                                                                                                                                                                                                                                                                                                                                                                                                                                                                                                                                                                                                                                                                                                                                                                                                                                                                                                                                                                                                                                                                                                                                                                                                                                                                                                                                                           |         |
| 42 |    |                                                                                                                                                                                                                                                                                                                                                                                                                                                                                                                                                                                                                                                                                                                                                                                                                                                                                                                                                                                                                                                                                                                                                                                                                                                                                                                                                                                                                                                                                                                           |         |
| 43 |    |                                                                                                                                                                                                                                                                                                                                                                                                                                                                                                                                                                                                                                                                                                                                                                                                                                                                                                                                                                                                                                                                                                                                                                                                                                                                                                                                                                                                                                                                                                                           |         |
| 44 |    |                                                                                                                                                                                                                                                                                                                                                                                                                                                                                                                                                                                                                                                                                                                                                                                                                                                                                                                                                                                                                                                                                                                                                                                                                                                                                                                                                                                                                                                                                                                           |         |
| 45 |    |                                                                                                                                                                                                                                                                                                                                                                                                                                                                                                                                                                                                                                                                                                                                                                                                                                                                                                                                                                                                                                                                                                                                                                                                                                                                                                                                                                                                                                                                                                                           |         |
| 46 |    |                                                                                                                                                                                                                                                                                                                                                                                                                                                                                                                                                                                                                                                                                                                                                                                                                                                                                                                                                                                                                                                                                                                                                                                                                                                                                                                                                                                                                                                                                                                           |         |
| 47 |    |                                                                                                                                                                                                                                                                                                                                                                                                                                                                                                                                                                                                                                                                                                                                                                                                                                                                                                                                                                                                                                                                                                                                                                                                                                                                                                                                                                                                                                                                                                                           |         |
| 48 |    |                                                                                                                                                                                                                                                                                                                                                                                                                                                                                                                                                                                                                                                                                                                                                                                                                                                                                                                                                                                                                                                                                                                                                                                                                                                                                                                                                                                                                                                                                                                           |         |
| 49 |    |                                                                                                                                                                                                                                                                                                                                                                                                                                                                                                                                                                                                                                                                                                                                                                                                                                                                                                                                                                                                                                                                                                                                                                                                                                                                                                                                                                                                                                                                                                                           |         |
| 50 |    |                                                                                                                                                                                                                                                                                                                                                                                                                                                                                                                                                                                                                                                                                                                                                                                                                                                                                                                                                                                                                                                                                                                                                                                                                                                                                                                                                                                                                                                                                                                           |         |
| 51 |    |                                                                                                                                                                                                                                                                                                                                                                                                                                                                                                                                                                                                                                                                                                                                                                                                                                                                                                                                                                                                                                                                                                                                                                                                                                                                                                                                                                                                                                                                                                                           |         |
| 52 |    |                                                                                                                                                                                                                                                                                                                                                                                                                                                                                                                                                                                                                                                                                                                                                                                                                                                                                                                                                                                                                                                                                                                                                                                                                                                                                                                                                                                                                                                                                                                           |         |
| 53 |    |                                                                                                                                                                                                                                                                                                                                                                                                                                                                                                                                                                                                                                                                                                                                                                                                                                                                                                                                                                                                                                                                                                                                                                                                                                                                                                                                                                                                                                                                                                                           |         |
| 54 |    |                                                                                                                                                                                                                                                                                                                                                                                                                                                                                                                                                                                                                                                                                                                                                                                                                                                                                                                                                                                                                                                                                                                                                                                                                                                                                                                                                                                                                                                                                                                           |         |
| 55 |    |                                                                                                                                                                                                                                                                                                                                                                                                                                                                                                                                                                                                                                                                                                                                                                                                                                                                                                                                                                                                                                                                                                                                                                                                                                                                                                                                                                                                                                                                                                                           |         |
| 56 |    |                                                                                                                                                                                                                                                                                                                                                                                                                                                                                                                                                                                                                                                                                                                                                                                                                                                                                                                                                                                                                                                                                                                                                                                                                                                                                                                                                                                                                                                                                                                           |         |
| 57 |    |                                                                                                                                                                                                                                                                                                                                                                                                                                                                                                                                                                                                                                                                                                                                                                                                                                                                                                                                                                                                                                                                                                                                                                                                                                                                                                                                                                                                                                                                                                                           |         |
| 58 |    |                                                                                                                                                                                                                                                                                                                                                                                                                                                                                                                                                                                                                                                                                                                                                                                                                                                                                                                                                                                                                                                                                                                                                                                                                                                                                                                                                                                                                                                                                                                           |         |
| 59 |    |                                                                                                                                                                                                                                                                                                                                                                                                                                                                                                                                                                                                                                                                                                                                                                                                                                                                                                                                                                                                                                                                                                                                                                                                                                                                                                                                                                                                                                                                                                                           |         |
| 60 |    |                                                                                                                                                                                                                                                                                                                                                                                                                                                                                                                                                                                                                                                                                                                                                                                                                                                                                                                                                                                                                                                                                                                                                                                                                                                                                                                                                                                                                                                                                                                           |         |

|    |    |                                                                                                |         |
|----|----|------------------------------------------------------------------------------------------------|---------|
| 1  |    |                                                                                                |         |
| 2  | 68 | (Angola* or Benin* or Botswana* or Bobo-Dioulasso or Burkin* or Burundi* or Camero* or         |         |
| 3  |    | Cape Verdean* or Cabo Verde* or Central African* or Chad* or Comoros or Congo* or              |         |
| 4  |    | Brazzaville or Cote d'Ivoire* or Ivory Coast or Djibouti* or Equatorial Guinea* or Eritrea* or |         |
| 5  |    | Ethiopia* or Gabon* or Gambia* or Ghana* or Guinea* or Kenya* or Lesoth* or Liberia* or        |         |
| 6  |    | Malagas* or Malawi* or Mali* or Mauritania* or Mauriti* or Mozambic* or Namibia* or Niger*     | 1115946 |
| 7  |    | or Nigeria* or Rwanda* or Sao Tomean* or Santomean* or Senegal* or Seychelloi* or              |         |
| 8  |    | Sierra Leone* or Somalia* or South Africa* or South Sudan* or Sudan* or Swazi* or              |         |
| 9  |    | Tanzania* or Togol* or Uganda* or Western Sahara or Zair* or Zambia* or Zimbabwe* or           |         |
| 10 |    | "Africa South of the Sahara" or Sub-Saharan or subsaharan or west africa* or east              |         |
| 11 |    | africa*).mp,jw.                                                                                |         |
| 12 | 69 | exp africa south of the sahara/                                                                | 213254  |
| 13 | 70 | or/65-69 [geography terms]                                                                     | 1136991 |
| 14 | 71 | 46 and 64 and 70                                                                               | 439     |
| 15 | 72 | "Stigma and discrimination experiences of HIV-positive men who have sex with men in            | 1       |
| 16 |    | Cape Town, South Africa ".ti.                                                                  |         |
| 17 | 73 | "intersecting stigmas and the positive health, dignity and prevention needs of HIV-positive    | 1       |
| 18 |    | men who have sex with men in Swaziland".ti.                                                    |         |
| 19 | 74 | "Sexual behavior stigma and depression among transgender women and cisgender men               | 1       |
| 20 |    | who have sex with men".ti.                                                                     |         |
| 21 | 75 | "Stretching the Boundaries: Tanzanian Pharmacy Workers' Views and Experiences of               | 1       |
| 22 |    | Providing STI Services for Men Who Have Sex with Men".ti.                                      |         |
| 23 | 76 | "Healthcare experiences of lesbian and bisexual women in Cape Town, South Africa".ti.          | 1       |
| 24 | 77 | "Suicidal ideation among MSM in three West African countries: Associations with stigma         | 1       |
| 25 |    | and social capital".ti.                                                                        |         |
| 26 | 78 | or/72-77 [validation articles from Dada and Kate]                                              | 6       |
| 27 | 79 | 78 and 71                                                                                      | 6       |
| 28 |    |                                                                                                |         |
| 29 |    |                                                                                                |         |
| 30 |    |                                                                                                |         |
| 31 |    |                                                                                                |         |
| 32 |    |                                                                                                |         |
| 33 |    |                                                                                                |         |
| 34 |    |                                                                                                |         |
| 35 |    |                                                                                                |         |
| 36 |    |                                                                                                |         |
| 37 |    |                                                                                                |         |
| 38 |    |                                                                                                |         |
| 39 |    |                                                                                                |         |
| 40 |    |                                                                                                |         |
| 41 |    |                                                                                                |         |
| 42 |    |                                                                                                |         |
| 43 |    |                                                                                                |         |
| 44 |    |                                                                                                |         |
| 45 |    |                                                                                                |         |
| 46 |    |                                                                                                |         |
| 47 |    |                                                                                                |         |
| 48 |    |                                                                                                |         |
| 49 |    |                                                                                                |         |
| 50 |    |                                                                                                |         |
| 51 |    |                                                                                                |         |
| 52 |    |                                                                                                |         |
| 53 |    |                                                                                                |         |
| 54 |    |                                                                                                |         |
| 55 |    |                                                                                                |         |
| 56 |    |                                                                                                |         |
| 57 |    |                                                                                                |         |
| 58 |    |                                                                                                |         |
| 59 |    |                                                                                                |         |
| 60 |    |                                                                                                |         |

## Preferred Reporting Items for Systematic reviews and Meta-Analyses extension for Scoping Reviews (PRISMA-ScR) Checklist

| SECTION                                               | ITEM | PRISMA-ScR CHECKLIST ITEM                                                                                                                                                                                                                                                                                  | REPORTED ON PAGE # |
|-------------------------------------------------------|------|------------------------------------------------------------------------------------------------------------------------------------------------------------------------------------------------------------------------------------------------------------------------------------------------------------|--------------------|
| <b>TITLE</b>                                          |      |                                                                                                                                                                                                                                                                                                            |                    |
| Title                                                 | 1    | Identify the report as a scoping review.                                                                                                                                                                                                                                                                   |                    |
| <b>ABSTRACT</b>                                       |      |                                                                                                                                                                                                                                                                                                            |                    |
| Structured summary                                    | 2    | Provide a structured summary that includes (as applicable): background, objectives, eligibility criteria, sources of evidence, charting methods, results, and conclusions that relate to the review questions and objectives.                                                                              |                    |
| <b>INTRODUCTION</b>                                   |      |                                                                                                                                                                                                                                                                                                            |                    |
| Rationale                                             | 3    | Describe the rationale for the review in the context of what is already known. Explain why the review questions/objectives lend themselves to a scoping review approach.                                                                                                                                   |                    |
| Objectives                                            | 4    | Provide an explicit statement of the questions and objectives being addressed with reference to their key elements (e.g., population or participants, concepts, and context) or other relevant key elements used to conceptualize the review questions and/or objectives.                                  |                    |
| <b>METHODS</b>                                        |      |                                                                                                                                                                                                                                                                                                            |                    |
| Protocol and registration                             | 5    | Indicate whether a review protocol exists; state if and where it can be accessed (e.g., a Web address); and if available, provide registration information, including the registration number.                                                                                                             |                    |
| Eligibility criteria                                  | 6    | Specify characteristics of the sources of evidence used as eligibility criteria (e.g., years considered, language, and publication status), and provide a rationale.                                                                                                                                       |                    |
| Information sources*                                  | 7    | Describe all information sources in the search (e.g., databases with dates of coverage and contact with authors to identify additional sources), as well as the date the most recent search was executed.                                                                                                  |                    |
| Search                                                | 8    | Present the full electronic search strategy for at least 1 database, including any limits used, such that it could be repeated.                                                                                                                                                                            |                    |
| Selection of sources of evidence†                     | 9    | State the process for selecting sources of evidence (i.e., screening and eligibility) included in the scoping review.                                                                                                                                                                                      |                    |
| Data charting process‡                                | 10   | Describe the methods of charting data from the included sources of evidence (e.g., calibrated forms or forms that have been tested by the team before their use, and whether data charting was done independently or in duplicate) and any processes for obtaining and confirming data from investigators. |                    |
| Data items                                            | 11   | List and define all variables for which data were sought and any assumptions and simplifications made.                                                                                                                                                                                                     |                    |
| Critical appraisal of individual sources of evidence§ | 12   | If done, provide a rationale for conducting a critical appraisal of included sources of evidence; describe the methods used and how this information was used in any data synthesis (if appropriate).                                                                                                      |                    |
| Synthesis of results                                  | 13   | Describe the methods of handling and summarizing the data that were charted.                                                                                                                                                                                                                               |                    |

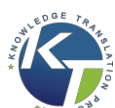

| SECTION                                       | ITEM | PRISMA-ScR CHECKLIST ITEM                                                                                                                                                                       | REPORTED ON PAGE # |
|-----------------------------------------------|------|-------------------------------------------------------------------------------------------------------------------------------------------------------------------------------------------------|--------------------|
| <b>RESULTS</b>                                |      |                                                                                                                                                                                                 |                    |
| Selection of sources of evidence              | 14   | Give numbers of sources of evidence screened, assessed for eligibility, and included in the review, with reasons for exclusions at each stage, ideally using a flow diagram.                    |                    |
| Characteristics of sources of evidence        | 15   | For each source of evidence, present characteristics for which data were charted and provide the citations.                                                                                     |                    |
| Critical appraisal within sources of evidence | 16   | If done, present data on critical appraisal of included sources of evidence (see item 12).                                                                                                      |                    |
| Results of individual sources of evidence     | 17   | For each included source of evidence, present the relevant data that were charted that relate to the review questions and objectives.                                                           |                    |
| Synthesis of results                          | 18   | Summarize and/or present the charting results as they relate to the review questions and objectives.                                                                                            |                    |
| <b>DISCUSSION</b>                             |      |                                                                                                                                                                                                 |                    |
| Summary of evidence                           | 19   | Summarize the main results (including an overview of concepts, themes, and types of evidence available), link to the review questions and objectives, and consider the relevance to key groups. |                    |
| Limitations                                   | 20   | Discuss the limitations of the scoping review process.                                                                                                                                          |                    |
| Conclusions                                   | 21   | Provide a general interpretation of the results with respect to the review questions and objectives, as well as potential implications and/or next steps.                                       |                    |
| <b>FUNDING</b>                                |      |                                                                                                                                                                                                 |                    |
| Funding                                       | 22   | Describe sources of funding for the included sources of evidence, as well as sources of funding for the scoping review. Describe the role of the funders of the scoping review.                 |                    |

JBI = Joanna Briggs Institute; PRISMA-ScR = Preferred Reporting Items for Systematic reviews and Meta-Analyses extension for Scoping Reviews.

\* Where *sources of evidence* (see second footnote) are compiled from, such as bibliographic databases, social media platforms, and Web sites.

† A more inclusive/heterogeneous term used to account for the different types of evidence or data sources (e.g., quantitative and/or qualitative research, expert opinion, and policy documents) that may be eligible in a scoping review as opposed to only studies. This is not to be confused with *information sources* (see first footnote).

‡ The frameworks by Arksey and O'Malley (6) and Levac and colleagues (7) and the JBI guidance (4, 5) refer to the process of data extraction in a scoping review as data charting.

§ The process of systematically examining research evidence to assess its validity, results, and relevance before using it to inform a decision. This term is used for items 12 and 19 instead of "risk of bias" (which is more applicable to systematic reviews of interventions) to include and acknowledge the various sources of evidence that may be used in a scoping review (e.g., quantitative and/or qualitative research, expert opinion, and policy document).

From: Tricco AC, Lillie E, Zarin W, O'Brien KK, Colquhoun H, Levac D, et al. PRISMA Extension for Scoping Reviews (PRISMA-ScR): Checklist and Explanation. *Ann Intern Med.* 2018;169:467–473. doi: 10.7326/M18-0850.

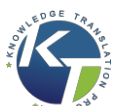

St. Michael's

Inspired Care.  
Inspiring Science.

For peer review only - <http://bmjopen.bmj.com/site/about/guidelines.xhtml>
