# Supplementary material for: Intersectional stigma and its impact on HIV prevention and care among MSM and WSW in sub-Saharan African countries: a protocol for a scoping review
Source: PubMed Central journal article supplement — BMJ Open. 2021 Aug 6;11(8):e047280. doi: 10.1136/bmjopen-2020-047280 (PMC8351482; doi:10.1136/bmjopen-2020-047280), 2021-08-06
Supplement: bmjopen-2020-047280supp001.pdf [file bmjopen-2020-047280supp001.pdf]

## Ovid MEDLINE(R) ALL &lt;1946 to November 23, 2020&gt;

Search history sorted by search number ascending

| #  | Searches                                                                             | Results |
|----|--------------------------------------------------------------------------------------|---------|
| 1  | [Gamji MEDLINE draft 20201124]                                                       | 0       |
| 2  | [queries from Kate's project with Sarah Abboud project, edited to focus on MSM, WSW] | 0       |
| 3  | bicurious.mp.                                                                        | 3       |
| 4  | bisexual*.mp.                                                                        | 10791   |
| 5  | gay.mp.                                                                              | 11636   |
| 6  | gays.mp.                                                                             | 460     |
| 7  | gender minorit*.mp.                                                                  | 4618    |
| 8  | gender queer.mp.                                                                     | 17      |
| 9  | GLB.mp.                                                                              | 409     |
| 10 | GLBQ.mp.                                                                             | 3       |
| 11 | GLBs.mp.                                                                             | 16      |
| 12 | GLBT.mp.                                                                             | 101     |
| 13 | GLBTQ.mp.                                                                            | 14      |
| 14 | heteroflexible.mp.                                                                   | 3       |
| 15 | homosexual*.mp.                                                                      | 35679   |
| 16 | lesbian*.mp.                                                                         | 7061    |
| 17 | lesbigay*.mp.                                                                        | 5       |
| 18 | LGB.mp.                                                                              | 1038    |
| 19 | LGBQ.mp.                                                                             | 112     |
| 20 | LGBS.mp.                                                                             | 68      |
| 21 | LGBT*.mp.                                                                            | 2652    |
| 22 | men who have sex with men.mp.                                                        | 11941   |
| 23 | mostly-heterosexual.mp.                                                              | 124     |
| 24 | MSM.mp.                                                                              | 10713   |
| 25 | MSMW.mp.                                                                             | 121     |
| 26 | nonheterosexual*.mp.                                                                 | 151     |
| 27 | non-heterosexual*.mp.                                                                | 279     |
| 28 | queer.mp.                                                                            | 1400    |
| 29 | queers.mp.                                                                           | 26      |
| 30 | same gender loving.mp.                                                               | 7       |
| 31 | same sex couple*.mp.                                                                 | 359     |
| 32 | same sex relations*.mp.                                                              | 324     |
| 33 | same-sex attract*.mp.                                                                | 297     |
| 34 | sexual identit*.mp.                                                                  | 1865    |
| 35 | sexual minorit*.mp.                                                                  | 2860    |
| 36 | sexual orientation*.mp.                                                              | 6157    |
| 37 | sexual preference*.mp.                                                               | 639     |
| 38 | SGM.mp.                                                                              | 603     |
| 39 | women loving women.mp.                                                               | 8       |
| 40 | women who have sex with women.mp.                                                    | 179     |
| 41 | WSW.mp.                                                                              | 153     |

|    |                                                                                                                                                                                                                                                                                                                                                                                                                                                                                                                                                                                                                                                                                                                                                                                                                                                                                                                                                                                                                                                                                                                                                                                                                                                                                                                                                                                                                                                                           |         |
|----|---------------------------------------------------------------------------------------------------------------------------------------------------------------------------------------------------------------------------------------------------------------------------------------------------------------------------------------------------------------------------------------------------------------------------------------------------------------------------------------------------------------------------------------------------------------------------------------------------------------------------------------------------------------------------------------------------------------------------------------------------------------------------------------------------------------------------------------------------------------------------------------------------------------------------------------------------------------------------------------------------------------------------------------------------------------------------------------------------------------------------------------------------------------------------------------------------------------------------------------------------------------------------------------------------------------------------------------------------------------------------------------------------------------------------------------------------------------------------|---------|
| 42 | WSWM.mp.                                                                                                                                                                                                                                                                                                                                                                                                                                                                                                                                                                                                                                                                                                                                                                                                                                                                                                                                                                                                                                                                                                                                                                                                                                                                                                                                                                                                                                                                  | 18      |
| 43 | "sexual and gender minorities"/                                                                                                                                                                                                                                                                                                                                                                                                                                                                                                                                                                                                                                                                                                                                                                                                                                                                                                                                                                                                                                                                                                                                                                                                                                                                                                                                                                                                                                           | 4045    |
| 44 | bisexuality/                                                                                                                                                                                                                                                                                                                                                                                                                                                                                                                                                                                                                                                                                                                                                                                                                                                                                                                                                                                                                                                                                                                                                                                                                                                                                                                                                                                                                                                              | 4227    |
| 45 | exp homosexuality/                                                                                                                                                                                                                                                                                                                                                                                                                                                                                                                                                                                                                                                                                                                                                                                                                                                                                                                                                                                                                                                                                                                                                                                                                                                                                                                                                                                                                                                        | 30137   |
| 46 | or/2-45 [population terms]                                                                                                                                                                                                                                                                                                                                                                                                                                                                                                                                                                                                                                                                                                                                                                                                                                                                                                                                                                                                                                                                                                                                                                                                                                                                                                                                                                                                                                                | 54126   |
| 47 | stigma*.mp.                                                                                                                                                                                                                                                                                                                                                                                                                                                                                                                                                                                                                                                                                                                                                                                                                                                                                                                                                                                                                                                                                                                                                                                                                                                                                                                                                                                                                                                               | 40591   |
| 48 | social stigma/                                                                                                                                                                                                                                                                                                                                                                                                                                                                                                                                                                                                                                                                                                                                                                                                                                                                                                                                                                                                                                                                                                                                                                                                                                                                                                                                                                                                                                                            | 8811    |
| 49 | exp shame/                                                                                                                                                                                                                                                                                                                                                                                                                                                                                                                                                                                                                                                                                                                                                                                                                                                                                                                                                                                                                                                                                                                                                                                                                                                                                                                                                                                                                                                                | 2458    |
| 50 | [terms from<br><a href="https://www.cochranelibrary.com/cdsr/doi/10.1002/14651858.CD009453.pub2/appendices#CD009453-sec1-0012">https://www.cochranelibrary.com/cdsr/doi/10.1002/14651858.CD009453.pub2/appendices#CD009453-sec1-0012</a> , Clement 2013, with my edits]                                                                                                                                                                                                                                                                                                                                                                                                                                                                                                                                                                                                                                                                                                                                                                                                                                                                                                                                                                                                                                                                                                                                                                                                   | 0       |
| 51 | stereotyping/                                                                                                                                                                                                                                                                                                                                                                                                                                                                                                                                                                                                                                                                                                                                                                                                                                                                                                                                                                                                                                                                                                                                                                                                                                                                                                                                                                                                                                                             | 11095   |
| 52 | (stereotyp* or stigma* or label* or negative image* or ignoran* or misconception* or misperception* or ((public* or community or social or popular) adj perception*)).mp.                                                                                                                                                                                                                                                                                                                                                                                                                                                                                                                                                                                                                                                                                                                                                                                                                                                                                                                                                                                                                                                                                                                                                                                                                                                                                                 | 753541  |
| 53 | social perception/                                                                                                                                                                                                                                                                                                                                                                                                                                                                                                                                                                                                                                                                                                                                                                                                                                                                                                                                                                                                                                                                                                                                                                                                                                                                                                                                                                                                                                                        | 23528   |
| 54 | public opinion/                                                                                                                                                                                                                                                                                                                                                                                                                                                                                                                                                                                                                                                                                                                                                                                                                                                                                                                                                                                                                                                                                                                                                                                                                                                                                                                                                                                                                                                           | 18779   |
| 55 | prejudice/ or homophobia/                                                                                                                                                                                                                                                                                                                                                                                                                                                                                                                                                                                                                                                                                                                                                                                                                                                                                                                                                                                                                                                                                                                                                                                                                                                                                                                                                                                                                                                 | 25301   |
| 56 | ((public* or community or social or popular or religious) adj attitude*).mp.                                                                                                                                                                                                                                                                                                                                                                                                                                                                                                                                                                                                                                                                                                                                                                                                                                                                                                                                                                                                                                                                                                                                                                                                                                                                                                                                                                                              | 3305    |
| 57 | ((negative or positive or chang*) adj3 attitude*) or prejudice* or hostil* or intoleran*).mp.                                                                                                                                                                                                                                                                                                                                                                                                                                                                                                                                                                                                                                                                                                                                                                                                                                                                                                                                                                                                                                                                                                                                                                                                                                                                                                                                                                             | 120023  |
| 58 | social distance/                                                                                                                                                                                                                                                                                                                                                                                                                                                                                                                                                                                                                                                                                                                                                                                                                                                                                                                                                                                                                                                                                                                                                                                                                                                                                                                                                                                                                                                          | 3087    |
| 59 | (social adj1 (distance or acceptance or rejection)).mp.                                                                                                                                                                                                                                                                                                                                                                                                                                                                                                                                                                                                                                                                                                                                                                                                                                                                                                                                                                                                                                                                                                                                                                                                                                                                                                                                                                                                                   | 5379    |
| 60 | rejection, psychology/                                                                                                                                                                                                                                                                                                                                                                                                                                                                                                                                                                                                                                                                                                                                                                                                                                                                                                                                                                                                                                                                                                                                                                                                                                                                                                                                                                                                                                                    | 1605    |
| 61 | (discriminat* or marginali* or rejecting behavi* or injustice* or (social adj (distance or justice or rejection or acceptance or exclusion or inclusion))).mp.                                                                                                                                                                                                                                                                                                                                                                                                                                                                                                                                                                                                                                                                                                                                                                                                                                                                                                                                                                                                                                                                                                                                                                                                                                                                                                            | 296664  |
| 62 | [additions based on <a href="https://bmcpublihealth.biomedcentral.com/articles/10.1186/s12889-018-5861-3">https://bmcpublihealth.biomedcentral.com/articles/10.1186/s12889-018-5861-3</a> , Jackson-Best 2018]                                                                                                                                                                                                                                                                                                                                                                                                                                                                                                                                                                                                                                                                                                                                                                                                                                                                                                                                                                                                                                                                                                                                                                                                                                                            | 0       |
| 63 | social discrimination/                                                                                                                                                                                                                                                                                                                                                                                                                                                                                                                                                                                                                                                                                                                                                                                                                                                                                                                                                                                                                                                                                                                                                                                                                                                                                                                                                                                                                                                    | 1281    |
| 64 | or/47-63 [stigma terms]                                                                                                                                                                                                                                                                                                                                                                                                                                                                                                                                                                                                                                                                                                                                                                                                                                                                                                                                                                                                                                                                                                                                                                                                                                                                                                                                                                                                                                                   | 1154251 |
| 65 | [the Sub-Saharan Africa hedge from the Canadian Health Libraries Association<br><a href="https://extranet.santecom.qc.ca/wiki/!biblio3s/doku.php?id=concepts:afrique-subsaharienne">https://extranet.santecom.qc.ca/wiki/!biblio3s/doku.php?id=concepts:afrique-subsaharienne</a> ]                                                                                                                                                                                                                                                                                                                                                                                                                                                                                                                                                                                                                                                                                                                                                                                                                                                                                                                                                                                                                                                                                                                                                                                       | 0       |
| 66 | Africa South of the Sahara/ or Angola/ or Benin/ or Botswana/ or Burkina Faso/ or Burundi/ or Cameroon/ or Cape Verde/ or Central African Republic/ or Chad/ or Comoros/ or Congo/ or Brazzaville/ or Cote d'Ivoire/ or Djibouti/ or Equatorial Guinea/ or Eritrea/ or Ethiopia/ or Gabon/ or Gambia/ or Ghana/ or Guinea/ or Bissau/ or Kenya/ or Lesotho/ or Liberia/ or Madagascar/ or Malawi/ or Mali/ or Mauritania/ or Mauritius/ or Mozambique/ or Namibia/ or Niger/ or Nigeria/ or Rwanda/ or Sao Tome e Principe/ or Senegal/ or Seychelles/ or Sierra Leone/ or Somalia/ or South Africa/ or South Sudan/ or Sudan/ or Swaziland/ or Tanzania/ or Togo/ or Uganda/ or Western Sahara/ or Zaire/ or Zambia/ or Zimbabwe/ or (Angola or Benin or Botswana or Bobo-Dioulasso or Burkina Faso or Burundi or Cameroon or Cape Verde or Central African Republic or Chad or Comoros or Congo or Brazzaville or Cote d'Ivoire or Djibouti or Equatorial Guinea or Eritrea or Ethiopia or Gabon or Gambia or Ghana or Guinea or Bissau or Kenya or Lesotho or Liberia or Madagascar or Malawi or Mali or Mauritania or Mauritius or Mozambique or Namibia or Niger or Nigeria or Rwanda or Sao Tome e Principe or Senegal or Seychelles or Sierra Leone or Somalia or South Africa or South Sudan or Sudan or Swaziland or Tanzania or Togo or Uganda or Western Sahara or Zaire or Zambia or Zimbabwe or "Africa South of the Sahara" or "Sub-Saharan Africa").tw,kw. | 397719  |
| 67 | [adjustments]                                                                                                                                                                                                                                                                                                                                                                                                                                                                                                                                                                                                                                                                                                                                                                                                                                                                                                                                                                                                                                                                                                                                                                                                                                                                                                                                                                                                                                                             | 0       |

|    |                                                                                                                                                                                                                                                                                                                                                                                                                                                                                                                                                                                                                                                                                                                                                                                                                        |         |
|----|------------------------------------------------------------------------------------------------------------------------------------------------------------------------------------------------------------------------------------------------------------------------------------------------------------------------------------------------------------------------------------------------------------------------------------------------------------------------------------------------------------------------------------------------------------------------------------------------------------------------------------------------------------------------------------------------------------------------------------------------------------------------------------------------------------------------|---------|
| 68 | (Angola* or Benin* or Botswana* or Bobo-Dioulasso or Burkin* or Burundi* or Camero* or Cape Verdean* or Cabo Verde* or Central African* or Chad* or Comoros or Congol* or Brazzaville or Cote d'Ivoire* or Ivory Coast or Djibouti* or Equatorial Guinea* or Eritrea* or Ethiopia* or Gabon* or Gambia* or Ghana* or Guinea* or Kenya* or Lesoth* or Liberia* or Malagas* or Malawi* or Mali* or Mauritania* or Mauriti* or Mozambic* or Namibia* or Niger* or Nigeria* or Rwanda* or Sao Tomean* or Santomean* or Senegal* or Seychelloi* or Sierra Leone* or Somalia* or South Africa* or South Sudan* or Sudan* or Swazi* or Tanzania* or Togol* or Uganda* or Western Sahara or Zair* or Zambia* or Zimbabwe* or "Africa South of the Sahara" or Sub-Saharan or subsaharan or west africa* or east africa*).mp.jw. | 1115946 |
| 69 | exp africa south of the sahara/                                                                                                                                                                                                                                                                                                                                                                                                                                                                                                                                                                                                                                                                                                                                                                                        | 213254  |
| 70 | or/65-69 [geography terms]                                                                                                                                                                                                                                                                                                                                                                                                                                                                                                                                                                                                                                                                                                                                                                                             | 1136991 |
| 71 | 46 and 64 and 70                                                                                                                                                                                                                                                                                                                                                                                                                                                                                                                                                                                                                                                                                                                                                                                                       | 439     |
| 72 | "Stigma and discrimination experiences of HIV-positive men who have sex with men in Cape Town, South Africa ".ti.                                                                                                                                                                                                                                                                                                                                                                                                                                                                                                                                                                                                                                                                                                      | 1       |
| 73 | "intersecting stigmas and the positive health, dignity and prevention needs of HIV-positive men who have sex with men in Swaziland".ti.                                                                                                                                                                                                                                                                                                                                                                                                                                                                                                                                                                                                                                                                                | 1       |
| 74 | "Sexual behavior stigma and depression among transgender women and cisgender men who have sex with men".ti.                                                                                                                                                                                                                                                                                                                                                                                                                                                                                                                                                                                                                                                                                                            | 1       |
| 75 | "Stretching the Boundaries: Tanzanian Pharmacy Workers' Views and Experiences of Providing STI Services for Men Who Have Sex with Men".ti.                                                                                                                                                                                                                                                                                                                                                                                                                                                                                                                                                                                                                                                                             | 1       |
| 76 | "Healthcare experiences of lesbian and bisexual women in Cape Town, South Africa".ti.                                                                                                                                                                                                                                                                                                                                                                                                                                                                                                                                                                                                                                                                                                                                  | 1       |
| 77 | "Suicidal ideation among MSM in three West African countries: Associations with stigma and social capital".ti.                                                                                                                                                                                                                                                                                                                                                                                                                                                                                                                                                                                                                                                                                                         | 1       |
| 78 | or/72-77 [validation articles from Dada and Kate]                                                                                                                                                                                                                                                                                                                                                                                                                                                                                                                                                                                                                                                                                                                                                                      | 6       |
| 79 | 78 and 71                                                                                                                                                                                                                                                                                                                                                                                                                                                                                                                                                                                                                                                                                                                                                                                                              | 6       |
